# Supplementary material for: Widespread Fosfomycin Resistance in Gram-Negative Bacteria Attributable to the Chromosomal fosA Gene
Source: PubMed Central journal article supplement (PMC5574708; doi:10.1128/mbio.00749-17), 2017-08-29
Supplement: mbo004173458sd1.pdf [file mbo004173458sd1.pdf]

>fosA\_1\_NZ\_ACWU01000146  
MLTGLNHLTLAVADLPASIAFYRDLLGFRLEARWDQGAYLELGSWLCLSLREPQYGGPAADYTHYAFGIAAAD  
FARFAAQLRAHGVREWKQNRSEGDSFYFLDPDGHRLEAHVGDLSRLAACRQAPYAGMRFAD  
>fosA\_2\_AGDM01000012  
MLSGLNHLTLAVSSLAPSVAFYHQLLGMTLHARWDGGAYLSCGDLWLCLSLDPQRRVTPPEESDYTHYAFSVA  
EADFAGFSARLETAGVAVWKNRSEGASYYFLDPDGHKLELHVGSALRLAACREQPYKGMVFYDE  
>fosA\_3\_NZ\_ACW001000079  
MLSGLNHLTLAVSQLAPSVAFYQQLGMTLHARWDSGAYLSCGDLWLCLSLDPQRRVTPPEESDYTHYAFSIS  
EADFASFAARLEAAGVAIWKNRSEGASHYFLDPDGHKLELHVGSQAQRLAACREQPYKGMVFFAE  
>fosA\_4\_NZ\_AFW01000027  
LKATGFNHVTIRVSDLSRSLLFYESLLGMKLVHRGRDLVYLEWGSAWICLIERSCESSEKPSYGVVDHIAFSIT  
EEDFHDAVKLQSGVPIVRGPLERGGGYSINFLDPDGTELELFTGSLAERMKGWS  
>fosA\_5\_NZ\_AEXB01000013  
MLQSLNHLTLAVSDLQKSVTFWHELLGLALYARWNTGAYLTCGDLWVCLSYDEARQYVPPQESDYTHYAFSTVA  
EEDFEPFSQRLEQAGVTVWKQNKSEGASFYFLDPDGHKLELHVGSAAARLAACREKPYAGMVFTSDEA  
>fosA\_6\_NZ\_DS999363  
VILGLNHITIAVSDLERSLKFYRETLGFTAHAKWDNGAYLSVGELWFCLSHDEPCPKTDYTHVAFDIEPKEFE  
AFAKRVVSLGVEVWVKQNKSEGQSLYILDPDGKLEIHSGLSKSRLESRLTKLYSGLVWL  
>fosA\_7\_NZ\_AFBO01000747  
MLSGLNHLTLAVSQLAPSVAFYQQLGMTLHARWDSGAYLSCGDLWLCLSLDPQRRVTPPDES DYTHYAFSIS  
EADFASFAVRLEAAGVAMWKNRSEGASHYFLDPDGHKLELHVGSQAQRLAACREQPYKGMVFFDQ  
>fosA\_8\_ACHE01000077  
MEITSVNHICFSVSDLNNTSIQFYKDILHGDLVSGRTTAYLTIGHTWIALNQEKNIPRNEISHSYTHIAFSID  
EEDFQQWIQWLKENQVNI LKGRPRDIKDKKSIYFTDPDGHKIE LHGTGTLKDRMEYYKCENTHMQFYDEF  
>fosA\_9\_NZ\_ACZD01000244  
MLSGLNHLTLAVSQLAPSVAFYQQLGMTLHARWDSGAYLSCGDLWLCLSLDPQRRVTPPEESDYTHYAFSIS  
EADFASFAARLEAAGVAIWKNRSEGASHYFLDPDGHKLELHVGSQAQRLAACREQPYKGMVFFDQ  
>fosA\_10\_EU195449  
MLSGLNHLTLAVSQLAPSVAFYQQLGMMLHARWDSGAYLSCGDLWLCLSLDPQRRVTPPEESDYTHYAFSIS  
EADFASFAARLEAAGVAVWKNRSEGASHYFLDPDGHKLELHVGSQAQRLAACREQPYKGMVFFAE  
>fosA\_11\_DQ396803  
MKYLLLVSHGDFSSGLKQTLGMFAGDDAIGSVIAVGLKPDEAASTFGTRFEALLKTLPEDASFVVLADIVGGS  
PLTTVCNINLNDHGKQLQDTLVLGGMNFPMALTTLMKSDSLDNSALKEKAFSEATAAIKEFQTTSSSEASDDDDI  
>fosA\_12\_AY692231  
MVRTYENAQELKEEISAAFRKYIAEFDDIPEALKDKRIDEVERTPAENLAYQVGWTTLLQWEDRERRGLPVR  
TPSDEFKWNQLGKLYRWFNDTYAHLSLRELEGMLTDNVDIYMMIDAMSEDELFKPHMRQWADDATKTAVWEV  
YRFIHVNTVAPFGSFRTKIRKWKRMAL  
>fosA\_13\_EU487198  
MLQSLNHLTLAVSDLQKSVTFWHELLGLTLHARWNTGAYLTCGDLWVCLSYDEARGYVPPQESDYTHYAFSTVA  
AEDFEPFSHKLEQAGVTVWKQNKSEGASFYFLDPDGHKLELHVGSAAARLAACREKPYAGMVFTSDEA  
>fosA\_14\_AB522970  
MLQGLNHLTLAVSDLASSLAFYQQLPGMRLHASWDSGAYLSCGALWLCLSLDEQRRKTPPQESDYTHYAFSVA  
EEEFAGVVALLAQAGA EVWKDNRSEGASYYFLDPDGHKLELHVGNLAQRLAACRERPYKGMVFFD  
>fosA\_15\_CP002889  
VKAAFRRLSENGENYSVPLRRQPPAVYGEHGVVYVHEVTVPRLAQKTKGHVMLQSLNHLTLAVSDLQKSVTF  
WHELLGLTLHARWNTGAYLTCGDLWVCLSYDEARGYVPPQESDYTHYAFSTVA AEDFEPFSHKLEQAGVTVWKQ  
NKSEGASFYFLDPDGHKLELHVGSAAARLAACREKPYAGMVFTSDEA  
>fosA\_16\_M85195  
MLQSLNHLTLAVSDLQKSVTFWHELLGLTLHARWNTGAYLTCGDLWVCLSYDEARQYVPPQESDYTHYAFSTVA  
EEDFEPLSQRLEQAGVTIWKQNKSEGASFYFLDPDGHKLELHVGSAAARLAACREKPYAGMVFTSDEA  
>FosAMM  
MLTGMNHLTLAVADLDRSLHFYRDI LKMTLHTRWKYGAYLTCGELWICLSADPEI IHRPIHQGYTHYAFSTLPP  
EQFPAFRSLAAHQITLWKRNRSEGDSVYFLDPDGHQLEAHSGGIQQRDLACREAPYEEMIFPAPGQINV  
>FosASR

MLVGINHLTIIVTDVEKSIFFYQSLGMLKHLASWKNLAYISCGDLWLCLSLDKTRLSFSHTETDYTHYAFTVS  
EADFPICVAKLKQANVIVWKENKSEGKSFYFLDPDGHKLELHVGLLQRLKSCQKAPYEGMKFY  
>FosAPS  
MLIGINHLTLAVSDIQKSI SFYQTVLGMQLHASWERGAYLTCGALWVCLSYDPMRQEVAAAKRRDYTHYAFTV  
LAEDFSDIVEKLEHQAGVTVWKNRSEGDSFYFLDPDGHQLEIHVGLIDRLKSCRKKPYDGMVFYS  
>FosASM  
MLTGLNHLTLAVSDLDRSDFYRHLGFTPHARWQGGAYLSLGLWCLSLDEARMQPRERDYTHYAFSVAPE  
HIERVSRERLQAGVEEWKSNRSEGESLYFLDPDGHQLEIHAGDLASRLAACREKPYQGMVFY  
>FosAEC  
MLQSLNHLTLAVSDLQKSVTFWHELLGLALHARWNTGAYLTCGDLWVCLSYDEARQYVPPQESDYTHYAFTVA  
EEDFEPFSHRLEQAGVTVWKNRSEGASFYFLDPDGHKLELHVGLSLAARLAACREKPYAGMVFTSDGA  
>FosAKO  
MLSGLNHLTLAVSQLAPSVAFYQQLPGMTLRARWDNGAYFSCGDLWLCLSLDPQRRVISPEESDYTHYAFSIA  
EADFALFAGRLNAAGVPVWKNRSEGASHYFLDPDGHKLELHVGLSLAARLAACRAKPYKGMVFFGEDEQAAGN  
P  
>FosAKP  
MLSGLNHLTLAVSQLAPSVAFYQQLGMTLHARWDSGAYLSCGDLWLCLSLDPQRRVTPPEESDYTHYAFSIS  
EADFASFAARLEAAGVAVWKNRSEGASHYFLDPDGHKLELHVGLSLAARLAACREKPYKGMVFFEQ  
>FosAEA  
MLSGLNHLTLAVSQLAPSVAFYHQLLGMTHARWDSGAYLSCGDLWLCLSLDPQRRVTPPEESDYTHYAFSIS  
EADFASFAARLEVAGVAVWKNRSEGESHYFLDPDGHKLELHVGNLAARLAACREKPYKGMVFFGE  
>GCA\_001039365  
VKAARFRRLSENGENYSVPPLRRQPPAVYGEHGVVYVHLFTVPRPARKTKGHVMLQSLNHLTLAVSDLQKSVTF  
WHELLGLALHARWNTGAYLTCGDLWVCLSYDEARQYVPPQESDYTHYAFTVAEADFEFPSQRLEQAGVTVWKN  
NKSEGASFYFLDPDGHKLELHVGLSLAARLAACREKPYAGMVFSDEA  
>GCA\_001375695  
VKAARFRRLSENGENYSVPPLRRQPPAVYGEHGVVYVHLFTVPRPARKTKGHVMLQSLNHLTLAVSDLQKSVTF  
WHELLGLTLHARWNTGAYLTCGDLWVCLSYDEARRYVPPQESDYTHYAFTVAEADFEFPSHRLEQAGVTVWKN  
NKSEGASFYFLDPDGHKLELHVGLSLAARLAACREKPYSGMVFSDEA  
>GCA\_900077785  
VKAARFRRLSENEENNSVPPLRRQPPAVYGEHGVVYVHLFTVPCPARKTKGHVMLQSLNHLTLAVSDLQKSVTF  
WHELLGLTLHARWNTGAYLTCGDLWVCLSYDEARRNVPPQESDYTHYAFTVAEADFEFPSQRLEQAGVTVWKN  
NKSEGASFYFLDPDGHKLELHVGLSLAARLAACREKPYAGMVFTSDGA  
>GCA\_900075815  
VKAARFRRLSENGENYSVPPLRRLPPAVYGEDGVVYVHLFTVPRPARKTKGHVMLQSLNHLTLAVSDLEKSI SF  
WHELLGLTLHARWNTGAYLTCGDLWVCLSYDEARRYVPPQESDYTHYAFTVAEADFEFPSQRLEQAGVTVWKN  
NKSEGASFYFLDPDGHKLELHVGLSLAARLAACREKPYAGMVFTSDGA  
>GCA\_900075805  
VKAARFRRLSENGENYSVPPLRRQPPAVYGEHGVVYVHLFTVPRPARKTKGHVMLQSLNHLTLAVSDLQKSVTF  
WHELLGLTLHARWNTGAYLTCGDLWVCLSYDEARQYVPPQESDYTHYAFTVAEEDFEPLSQRLEQAGVTVWKN  
NKSEGASFYFLDPDGHKLELHVGLSLAARLAACREKPYAGMVFTSDGA  
>GCA\_900075305  
VKAARFRRLSENGENYSVPPLRRQPPAVYGEHGVVYVHLFTVPRPARKTKGHVMLQSLNHLTLAVSDLQKSVTF  
WHELLGLALHARWNTGAYLTCGDLWVCLSYVEARQYVPPQESDYTHYAFTVAEADFEPLSQRLEQAGVTVWKN  
NKSEGASFYFLDPDGHKLELHVGLSLAARLAACREKPYAGMVFTSDGA  
>GCA\_000534055  
VKAARFRRLSENGENYSEPPPLRRQPPAVYGEHGVVYVHAFTVSRPARKTKGHVMLQSLNHLTLAVSDLQKSVTF  
WHELLGLALHARWNTGAYLTCGDLWVCLSYDEARQYVPPQESDYTHYAFTVAEEDFEFPSQRLEQAGVTVWKN  
NKSEGASFYFLDPDGHKLELHVGLSLAARLAACREKPYAGMVFTSDGA  
>GCA\_900077675  
VKAARFRRLSENGENYSVPPLRRQPPAVYGEHGVVYVHLFTVSRPARKTKGLIMLQSLNHLTLAVSDLQKSVTF  
WHELLGLTLHARWNTGAYLTCGDLWVCLSYDEARQYVPPQESDYTHYAFTVAEAEFEFPSNKLEQAGVIVWKN  
NKSEGASFYFLDPDGHKLELHVGLSLAARLAACREKPYAGMVFTSDGA  
>GCA\_001054625

VKAAFRRLENGENYSVPPLRRQPPAVYGEHGVVYVHLFTVPRPARKTKGHVMLQSLNHLTLAVSDLQKSVTF  
WHELLGLTLHARWNTGAYLTCGDLWVCLSYDEARRYVPPQESDYTHYAFTVAEADFEFQKLEQAGVTVWKQ  
NKSEGASFYFLDPDGHKLELHVGS LAARLAACREKPYAGMVFTSNEA  
>GCA\_900075035

VKAAFRRLENGENYSVPPLRRQPPAVYGEHGVVYVHLFTVPRPARKTKGHVMLQSLNHLTLAVSDLQKSVTF  
WHELLGLALHARWNTGAYLTCGDLWVCLSYDEARQYVPPQESDYTHYAFTVAEADFEPLSQRLEQAGVTVWKQ  
NKSEGASFYFLDPDGHKLELHVGS LAARLAACREKPYAGMVFTSDGA  
>GCA\_000235765

VKAAFRRLENGENYSVPPLRRQPPAVYGEHGVVYVHLFTVPRPAKTKGHVMLQSLNHLTLAVSDLQKSVTFW  
HELLGLALHARWNTGAYLTCGDLWVCLSYDEARQYVPPQESDYTHYAFTVSEEDFEFQKLEQAGVTVWKQ  
KSEGASFYFLDPDGHKLELHVGS LAARLAACREKPYAGMVFTSDEA  
>GCA\_000210775

VKAAFRRLENGENYSVPPLRRQPPAVYGEHGVVYVHLFTVPCPARKTKGHVMLQSLNHLTLAVSDLQKSVTF  
WHELLGLALHARWNTGAYLTCGDLWVCLSYDEARQYVPPQESDYTHYAFTVAEEDFEFQKLEQAGVTVWKQ  
NKSEGASFYFLDPDGHKLELHVGS LAARLAACREKPYAGMVFTSDEA  
>GCA\_001052195

VKAAFRRLENGENYSVPPLRRQPPAVYGEDGVVYVHAFTVPRPARKTKGHVMLQSLNHLTLAVSDLQKSVTF  
WHELLGLALHARWNTGAYLTCGDLWVCLSYDEARRYVPPQESDYTHYAFTVAEEDFEFQKLEQAGVTVWKQ  
NKSEGASFYFLDPDGHKLELHVGS LAARLAACREKPYAGMVFTSDEA  
>GCA\_900076085

VKAAFRRLENGENYSVPPLRRQPPAVYGEHGVVYVHAFTVPRPARKTKGHVMLQSLNHLTLAVSDLQKSVTF  
WHELLGLTLHARWNTGAYLTCGDLWVCLSYDEARQYVPPQESDYTHYAFTVAEADFEFQKLEQAGVTVWKQ  
NKSEGASFYFLDPDGHKLELHVGS LAARLAACREKPYAGMVFTSDEA  
>GCA\_900076575

VKAAFRRLENGENYSVPPLRRQPPAVYGEHGVVYVHEVTVPRLAQKTKGHVMLQSLNHLTLAVSDLQKSVTF  
WHELLGLTLHARWNTGAYLTCGDLWVCLSYDEARQYVPPQESDYTHYAFTVAEEDFEFQKLEQAGVTVWKQ  
NKSEGASFYFLDPDGHKLELHVGS LAARLAACREKPYAGMVFTSDEA  
>GCA\_001029645

VKAAFRRLENGENYSVPPLRRQPPAVYGEHGVVYVHVTVPRLAQKTKGHVMLQSLNHLTLAVSDLQKSVTFW  
HELLGLTLHARWNTGAYLTCGDLWVCLSYDEARQYVPPQESDYTHYAFTVAEEDFEFQKLEQAGVTVWKQ  
KSEGASFYFLDPDGHKLELHVGS LAARLAACREKPYAGMVFTSDEA  
>GCA\_000958885

VKAAFRRLENGENYSVPPLRRLPPAVYGEHGVVYVHLFTVSRPARKTKGHVMLQSFNHLTLAVSDLQKSVTF  
WHELLGLTLHARWNTGAYLTCGDLWVCLSYDEARRYVPPQESDYTHYAFTVAEEDFEFQKLEQAGVTVWKQ  
NKSEGASFYFLDPDGHKLELHVGS LAARLAACREKPYAGMVFTSDEA  
>GCA\_900075695

VKAAFRRLENGENYSVPPLRRQPPAVYGEHGVVYVHLFTVSRPARKTKGHVMLQSLNHLTLAVSDLQKSVTF  
WHELLGLELHARWNTGAYLTCGELWVCLSYDEARRYVPPQESDYTHYAFTVAEEDFEFQKLEQAGVTVWKQ  
NKSEGASFYFLDPDGHKLELHVGS LAARLAACREKPYSGMVFTSDEA  
>GCA\_900075045

VKAAFRRLENGENYSVPPLRRQPPAVYGEHGVVYVHLFTVPRPARKTKGHVMLQSLNHLTLAVSDLQKSVTF  
WHELLGLTLHARWNTGAYLTCGDLWVCLSYDEARQYVPPQKSDYTHYAFTVAEEDFEFQKLEQAGVTVWKQ  
NKSEGASFYFLDPDGHKLELHVGS LAARLAACREKPYAGMVFTSDEA  
>GCA\_900075395

VKAAFRRLENGENYSVPPLRRQPPAVYGEHGVVYVHLFTVSRPARKTKGHVMLQSLNHLTLAVSDLQKSVSF  
WHELLGLTLHARWNTGAYLTCGDLWVCLSYDEARQYVPPQESDYTHYAFTVAEEDFEFQKLEQAGVTVWKQ  
NKSEGASFYFLDPDGHKLELHVGS LAARLAACREKPYAGMVFTSDGA  
>GCA\_000952375

VKAAFRRLENGENYSEPLRRQPPAVYGEHGVVYVHLFTVSRPARKTKGLIMLQSLNHLTLAVSDLQKSITF  
WHELLGLTLHARWNTGAYLTCGDLWVCLSYDEARQYVPPQESDYTHYAFTVAEADFEFQKLEQAGVTVWKQ  
NKSEGASFYFLDPDGHKLELHVGS LAARLAACREKPYAGMVFTSDEA  
>GCA\_001190095

VKAAFRRLENGENYSVPPLRRQPPAVYGEHGVVYVHLFTVSRPARKTKGHVMLQSLNHLTLAVSDLQKSVTF  
WHELLGLALHARWNTGAYLTCGDLWVCLSYDEARRYVPPQESDYTHYAFTVSEADFEPPFSQRLEQAGVTVWKQ  
NKSEGASFYFLDPDGHKLELHVGS LAARLAACREKPYAGMVFTSDEA  
>GCA\_001052225

VKAAFRRLENGENYSVPPLRRQPPAVYGEDGVVYVHLFTVPRPARKTKGHVMLQSLNHLTLAVSDLQKSVTF  
WHELLGLALHARWNTGAYLTCGELWVCLSYDEARRYVPPQESDYTHYAFTVAEEDFEPPFSHRLEQAGVTVWKQ  
NKSEGASFYFLDPDGHKLELHVGS LAARLAACREKPYSGMVFASDEA  
>GCA\_900077845

VKAAFRRLENGENYSVPPLRRQPPAVYGEDGVVYVHLFTVSRPARKTKGHVMLQSLNHLTLAVSDLQKSVTF  
WHELLGLTLHARWNTGAYLTCGDLWVCLSYDEARRYVPPQESDYTHYAFTVTEEDFEPPFSHRLEQAGVTVWKQ  
NKSEGASYYFLDPDGHKLELHVGS LAARLAACREKPYAGMVFTSDEA  
>GCA\_000783675

VKAAFRRLENGENYSVPPLRRQPPAVYGEHGVVYVHLFTVPRPARKTKGHVMLQSLNHLTLAVSDLQKSVTF  
WHELLGLALHARWNTGAYLTCGDLWVCLSYDEARQYVPPQESDYTHYAFTVAEADFEPPFSQRLEQAGVTVWKQ  
NKSEGASFYFLDPDGHKLELHVGS LAARLAACREKPYAGMVFASDEA  
>GCA\_000812505

VKAAFRRLENGENYSVPPLRRQPPAVYGEHGVVYVHAFTVSRPAQKTKGHVMLQSLNHLTLAVSDLQKSVTF  
WHELLGLALHARWNTGAYLTCGDLWVCLSYDEARRNVPQESDYTHYAFTVAEEDFEPPFSHRLEQAGVTVWKQ  
NKSEGASFYFLDPDGHKLELHVGS LAARLAACREKPYAGMVFTSDGA  
>GCA\_900076485

VKAAFRRLENGENYSVPPLRRQPPAVYGEHGVVYVHLFTVSRPARKTKGHVMLQSLNHLTLAVSDLQKSVTF  
WHALLGLTLHARWNTGAYLTCGELWVCLSYDEARRYVPPQESDYTHYAFTVAEEDFEPPFSQRLEQAGVTVWKQ  
NKSEGASFYFLDPDGHKLELHVGS LAARLAACREKPYAGMVFTSDEA  
>GCA\_900078045

VKAAFRRLENGENYSVPPLRRQPPAVYGEHGVVYVHAFTVPRPARKTKGHVMLQSLNHLTLAVSDLQKSVTF  
WHELLGLTLHARWNTGAYLTCGDLWVCLSYDEARQYVPPQESDYTHYAFTVAEADFEPPFSHRLEQAGVTVWKQ  
NKSEGASFYFLDPDGHKLELHVGS LAARLAACREKPYAGMVFTSDEA  
>GCA\_900075595

VKAAFRRLENGENYSVPPLRRQPPAVYGEHGVVYVHLFTVPRPARKTKGHVMLQSLNHLTLAVSDLQKSVTF  
WHELLGLALHARWNTGAYLTCGDLWVCLSYDEARQYVPPQESDYTHYAFTVAEEDFEPLSQRLEQAGVTVWKQ  
NKSEGASFYFLDPDGHKLELHVGS LAARLAACREKPYAGMVFTSDGA  
>GCA\_000534215

VKAAFRRLENGENYSVPPLRRQPPAVYGEHGVVYVHLFTVPCPARKTKGHVMLQSLNHLTLAVSDLQKSVTF  
WHELLGLALHARWNTGAYLTCGDLWVCLSYDEARGNVPQESDYTHYAFTVAEADFEPPFSQRLEQAGVTVWKQ  
NKSEGASFYFLDPDGHKLELHVGS LAARLAACREKPYAGMVFTSDEA  
>GCA\_001653545

VKAAFRRLENGENYSVPPLRRQPPAVYGEHGVVYVHLFTVPCPARKTKGHVMLQSLNHLTLAVSDLQKSVTF  
WHELLGLALHARWNTGAYLTCGDLWVCLSYDEARQYVPPQESDYTHYAFTVAEEDFEPPFSQRLEQAGVTVWKQ  
NKSEGASFYFLDPDGHKLELHVGS LAARLAACREKPYAGMVFTSDEA  
>GCA\_900075935

VKAAFRRLENGENYSVPPLRRQPPAVYGEHGVVYVHEVTVPRLAQKTKGHVMLQSLNHLTLAVSDLQKSVTF  
WHELLGLTLHARWNTGAYLTCGDLWVCLSYDEARQYVPPQESDYTHYAFTVAEEDFEPPFSHRLEQAGVTVWKQ  
NKSEGASFYFLDPDGHKLELHVGS LAARLAACREKPYAGMVFTSDEA  
>GCA\_001055075

VKAAFRRLENGENYSVPPLRRQPPAVYGEHGVVYVHLFTVPRPARKTKGHVMLQSLNHLTLAVSDLQKSVTF  
WHELLGLALHARWNTGAYLTCRDLWVCLSYDEARQYVPPQESDYTHYAFTVAEEDFDADFRRLEQAGVTVWKQ  
NKSEGASFYFLDPDGHKLELHVGS LAARLAACREKPYAGMVFTSDEA  
>GCA\_900076725

VKAAFRRLENGENYSVPPLRRQPPAVYGEDGVVYVHAFTVPRPARKTKGHVMLQSLNHLTLAVSDLQKSVTF  
WHALLGLTLHARWNTGAYLTCGELWVCLSYDEARRYVPPQESDYTHYAFTVAEEDFEPPFSHRLEQAGVTVWKQ  
NKSEGASFYFLDPDGHKLELHVGS LAARLAACREKPYAGMVFTSDEA  
>GCA\_000747015

VKAAFRRLSENEENYSVPPLRRQPPAVYGEHGVVYVHLFTVPCPARKTKGHVMLQSLNHLTLAVSDLQKSVTF  
WHELLGLALHARWNTGAYLTCGDLWVCLSYDEARRYVPPQESDYTHYAFTVAEADFEPPFSQRLEQAGVTVWKQ  
NKSEGASFYFLDPDGHKLELHVGS LAARLAACREKPYAGMVFTSDKA  
>GCA\_000422225

VKAAFRRLSENGENYSVPPLRRQPPAVYGEHGVVYVHEVTVPRLAQKTKGHVMLQSLNHLTLAVSDLQKSVTF  
WHELLGLTLHSRWNTGAYLTCGDLWVCLSYDEARGYVPPQESDYTHYAFTVAEADFEPPFSHKLEQAGVTVWKQ  
NKSEGASFYFLDPDGHKLELHVGS LAARLAACREKPYAGMVFTSDEA  
>GCA\_900075095

VKAAFRRLSENEENNSGPPPLRRQPPAVYGEDGVVYVHLFTVPCPARKTKGHVMLQSLNHLTLAVSDLQKSVTF  
WHELLGLTLHARWNTGAYLTCGDLWVCLSYDEARQYVPPQESDYTHYAFTVAEEDFEPPFSQRLEQAGVTVWKQ  
NKSEGASFYFLDPDGHKLELHVGS LAARLAACREKPYAGMVFTSDEA  
>GCA\_900077535

VKAAFRRLSENGENYSVPPLRRQPPAVYGEHGVVYVHLFTVSRPARKTKGLIMLQSLNHLTLAVSDLQKSVTF  
WHELLGLTLHARWNTGAYLTCGDLWVCLSYDEARQYVPPQEI DYTHYAFTVAEADFEPPFSNKLEQAGVTVWKQ  
NKSEGASFYFLDPDGHKLELHVGS LAARLAACREKPYAGMVFTSDEA  
>GCA\_001054505

VKAAFRRLSENGKNYSVPPLRRQPPAVYGEHGVVYVHLFTVSRPARKTKGHVMLLSLNHLTLAVSDLQKSVTF  
WHELLGLTLHARWNTGAYLTCGDLWVCLSYDEARRYAPPQESDYTHYAFTVAEADFEPPFSQRLEQAGVTVWKQ  
NKSEGASFYFLDPDGHKLELHVGS LAARLAACREKPYAGMVFTSDEA  
>GCA\_900075075

VKAAFRRLSENGENYSVPPLRRQPPAVYGEHGVVYVHLFTVSRPARKTKGHVMLQSLNHLTLAVSDLQKSVTF  
WHELLGLTLHARWNSGAYLTCGDLWVCLSYDEARRYVPPQESDYTHYAFTVAEADFEPPFSNKLEQAGVTVWKQ  
NKSEGASFYFLDPDGHKLELHVGNLAARLAACREKPYAGMVFTSDEA  
>GCA\_001653625

VKAAFRRLSENGENYSVPPLRRQPPAVYGEHGVVYVHAFTVSRPARKTKGHVMLQSLNHLTLAVSDLQKSVTF  
WHELLGLTLHARWNTGAYLTCGDLWVCLSYDEARQYVPSQESDYTHYAFTVAEEDFEPPFSQRLEQAGVTVWKQ  
NKSEGASFYFLDPDGHKLELHVGS LAARLAACREKPYAGMVFTSDKA  
>GCA\_900077545

VKAAFRRLSENGENYSVPPLRRQPPAVYGEHGVVYVHLFTVSRPARKTKGHVMLQSLNHLTLAVSDLQKSVTF  
WHELLGLALHARWNTGAYLTCGDLWVCLSYDEARQYVPPQESDYTHYAFTVAEEDFEPPFSQRLEQAGVTVWKQ  
NKSEGASFYFLDPDGHKLELHVGS LAARLAACREKPYAGMVFTSDEA  
>GCA\_900075315

VKAAFRRLSENGENYSVPPLRRQPPAVYGEHGVVYVHLFTVPRPARKTKGHVMLQSLNHLTLAVSDLQKSVTF  
WHELLGLALHARWNTGAYLTCGDLWVCLSYDEARRYVPPQESDYTHYAFTVAEADFEPPFSQRLEQAGVTVWKQ  
NKSEGASFYFLDPDGHKLELHVGS LAARLAACREKPYAGMVFTSDKA  
>GCA\_900075065

VKAAFRRLSENGENYSVPPLRRQPPAVYGEHGVVYVHLFTVSRPARKTKGHVMLQSLNHLTLAVSDLQKSVTF  
WHELLGLTLHARWNTGAYLTCGDLWVCLSYDEARQYVPPQESDYTHYAFTVAEEDFEPPFSQRLEQAGVTVWKQ  
NKSEGASFYFLDPDGHKLELHVGS LAARLAACREKPYAGMVFTSDGA  
>GCA\_000968725

VKAAFRRLSENGENYSVPPLRRQPPAVYGEHGVVYVHLFTVPRPARKTKGHVMLQSLNHLTLAVSDLQKSVTF  
WHALLGLTLHARWNTGAYLTCGDLWVCLSYDEARQYVPPQESDYTHYAFTIAEADFEPPFSQRLEQAGVTVWKQ  
NKSEGASYYYFLDPDGHKLELHVGS LAARLAACREKPYAGMVFTSDEA  
>GCA\_000953895

VKAAFRRLSENGENYSVPPLRRQPPAVYGEYGVVYVHLFTVPRPARKTKGHVMLQSLNHLTLAVSDLQKSVTF  
WHELLGLTLHARWNTGAYLTCGDLWVCLSYDEARRYVPPQESDYTHYAFTLAEADFEPPFSQKLEQAGVTVWKQ  
NKSEGASFYFLDPDGHKLELHVGS LAARLAACREKPYAGMVFTSDEA  
>GCA\_000952575

VKAAFRRLSENGENYSVPPLRRQPPAVYGEHGVVYVHLFTVPRPARKTKGHVMLQSLNHLTLAVSDLQKSVTF  
WHELLGLTLHARWNTGAYLTCGDLWVCLSYDEARQYVPPQESDYTHYAFTVAEADFEPPFSHRLEQAGVTVWKQ  
NKSEGASFYFLDPDGHKLELHVGS LAARLAACREKPYAGMVFTSDEA  
>GCA\_000938355

VKAAFRRLENGENYSVPPLRRQPPAVYGEDGVVYVHAFTVPRPARKTKGHVMLQSLNHLTIAVSDLQKSVTF  
WHALLGLTLHARWNTGAYLTCGELWVCLSYDEARRYVPPQESDYTHYAFTVAEEDFEPFSQRLEQAGVTVWKQ  
NKSEGASFYFLDPDGHKLELHVGS LAARLAACREKPYAGMVFTSDGA  
>GCA\_001055515

VKAAFRRLENGKNYSVPPLRRQPPAVYGEDGVVYVHLFTVPRPARKTKGHVMLQSLNHLTLAVSDLQKSITF  
WHALLGLTLHARWKTGAYLTCGDLWVCLSYDEARRYVPPQESDYSHYAFTVAEEDFEPFSQRLEQAGVTVWKQ  
NKSEGASFYFLDPDGHKLELHVGS LAARLAACREKPYAGMVFTSDEA  
>GCA\_900075895

VKAAFRRLENGKNYSVPPLRRQPPAVYGEHGVVYVHLFTVPRPARKTKGHVMLQSLNHLTLAVSDLQKSVTF  
WHELLGLALHARWNTGAYLTCGDLWVCLSYDEARQYVPPQESDYTHYAFTVAEEDFEPFSERLEQAGVTVWKQ  
NKSEGASFYFLDPDGHKLELHVGS LAARLAACREKPYAGMVFTSDGA  
>GCA\_900076205

VKAAFRRLENEENNSGPPLRRQPPAVYGEDGVVYVHAFTVSRPARKTKGHVMLQSLNHLTLAVSDLQKSVTF  
WHELLGLALHARWNTGAYLTCGDLWVCLSYDEARRYVPPQESDYTHYAFTVAEADFEFFSQRLEQAGVTVWKQ  
NKSEGASFYFLDPDGHKLELHVGS LAARLAACREKPYAGMVFTSDKA  
>GCA\_001562175

VKAAFRRLENEENYSVPPLRRKPPAVYGEHGVVYVHLFTVPRPARKTKGHVMLQSLNHLTLAVSDLQKSVTF  
WHELLGLALHARWNTGAYLTCGDLWICLSYDEARQYVPPQESDYTHYAFTVAEEDFEPFSQRLEQAGVTVWKQ  
NKSEGASFYFLDPDGHKLELHVGS LAARLAACREKPYAGMVFTSDKA  
>GCA\_900075995

VKAAFRRLENEENYSVPPLRRQPPAVYGEDGVVYVHAFTVSRPARKTKGHVMLQSLNHLTLAVSDLQKSVTF  
WHELLGLALHARWNTGAYLTCGDLWVCLSYDEARQYVPPQESDYTHYAFTVAEEDFEPFSQRLEQAGVTVWKQ  
NKSEGASFYFLDPDGHKLELHVGS LAARLAACREKPYAGMVFTSDEA  
>GCA\_001054435

VKAAFRRLENGENYSVPPLRRQPPAVYGEHGVVYVHLFTVPRPARKTKGHVMLQSLNHLTLAVSDLQKSISF  
WHELLGLTLHARWNTGAYLTCGDLWICLSYDEARRYVPPQESDYTHYAFTVAEADFEFFSQRLEQAGVTVWKQ  
NKSEGASFYFLDPDGHKLELHVGS LAARLAACREKPYAGMVFTSDEA  
>GCA\_000564975

VKAAFRRLENGENYSVPPLRRQPPAVYGEHGVVYVHLFTVPRPARKTKGHVMLQSLNHLTLAVSDLQKSVTF  
WHELLGLTLHARWNTGAYLTCGDLWVCLSYDEARQYVPPQESDYTHYAFTVAEEDFEPFSHRLEQAGVTVWKQ  
NKSEGASFYFLDPDGHKLELHVGS LAARLAACREKPYAGMVFTSDEA  
>GCA\_001473135

VKAAFRRLENGENYSVPPLRRQPPAVYGEHGVVYVHAFTVSRPAQKTKGHVMLQSLNHLTLAVSDLQKSVTF  
WHELLGLALHARWNTGAYLTCGDLWVCLSYDEARQYVPPQESDYTHYAFTVAEEDFEPFSHRLEQAGVTVWKQ  
NKSEGASFYFLDPDGHKLELHVGS LAARLAACREKPYAGMVFTSDGA  
>GCA\_900077855

VKAAFRRLENGENYSVPPLRRQPPAVYGEHGVVYVHAFTVSRPAQKTKGHVMLQSLNHLTLAVSDLQKSVTF  
WHELLGLALHARWNTGAYLTCGELWVCLSYDEARRYVPPQESDYTHYAFTVAEEDFEPFSHRLEQAGVTVWKQ  
NKSEGASFYFLDPDGHKLELHVGS LAARLAACREKPYAGMVFTSDEA  
>GCA\_900078025

KAAFRRLENGENYSVPPLRRQPPAVYGEDGVVYVHLFTVPRPARKTKGHVMLQSLNHLTLAVSDLQKSVTFW  
HELLGLTLHARWNTGAYLTCGDLWVCLSYDEARRYVPPQESDYTHYAFTVAEADFEFFSQRLEQAGVTVWKQN  
KSEGASFYFLDPDGHKLELHVGS LAARLAACREKPYAGMVFTSDEA  
>GCA\_001057545

KAAFRRLENGENNSEPPPLRRQPPAVYGEHGVVYVHGFTVSRPARKTKGLIMLQSLNHLTLAVSDLQKSITFW  
HELLGLTLHARWNTGAYLTCGDLWVCLSYDEARQYVPPQESDYTHYAFTVAEADFEFFSNKLEQEGVTVWKQN  
KSEGASFYFLDPDGHKLELHVGS LAARLAACREKPYAGMVFTSDEA  
>GCA\_000492455

KAAFRRLENGENYSVPPLRRQPPAVYGEHGVVYVHLFTVPCPARKTKGHVMLQSLNHLTLAVSDLQKSVTFW  
HELLGLTLHARWNTGAYLTCGDLWVCLSYDEARQYVPPQKSDYTHYAFTVAEADFEFFSQRLEQAGVTVWKQN  
KSEGASFYFLDPDGHKLELHVGS LAARLAACREKPYAGMVFTSDEA  
>GCA\_000692255

KAAFRRLSENGENNSEPPPLRRQPPAVYGEHDVVYVHAFVTVSRPARKTKGLIMLQSLNHLTLAVSDLQKSITFW  
HELLGLTLHARWNTGAYLTCGDLWVCLSYDEARQYVPPQESDYTHYAFTVAEADFEPPFSNKLEQAGVTVWKQN  
KSEGASFYFLDPDGHKLELHVGS LAARLAACREKPYAGMVFTSDEA  
>GCA\_900078075

KAAFRRLSENGENYSVPPLRRQPPAVYGEHGVVYVHLFTVPRPARKTKGHVMLQSLNHLTLAVSDLQKSITFW  
HELLGLPLHARWNTGAYLTCGDLWVCLSYDEARQYVPPQESDYTHYAFTVAEEDFEPPFSHRLEQAGVTVWKQN  
KSEGASFYFLDPDGHKLELHVGS LAARLAACREKPYAGMVFTSDGA  
>GCA\_900075575

KAAFRRLSENGKNYSVPPLRRQPPAVYGEDGVVYVHAFVTVSRPARKTKGHVMLQSLNHLTLAVSDLQKSINFW  
HELMGLTLHARWNTGAYLTCGDLWVCLSYDEARRYVPPQESDYTHYAFTVAEEDFEPPFSQRLEQAGVTVWKQN  
KSEGASFYFLDPDGHKLELHVGS LAARLAACREKPYAGMLFTSDEA  
>GCA\_001472955

KAAFRRLSENGENYSVPPLRRQPPAVYGEHGVVYVHAFVTVSRPAQKTKGHVMLQSLNHLTLAVSDLQKSITFW  
HELLGLALHARWNTGAYLTCGDLWVCLSYDEARQYVPPQESDYTHYAFTVAEEDFEPPFSHRLDQAGVTVWKQN  
KSEGASFYFLDPDGHKLELHVGS LAARLAACREKPYAGMVFTSDGA  
>GCA\_001053395

KAAFRRLSENGENNSEPPPLRRQPPAVYGEHGVVYVHLFTVSRPARKTKGLIMMOSFNHLTLAVSDLQKSITFW  
HELLGLTLHARWNTGAYLTCGDLWVCLSYDEARQYVPPQESDYTHYAFTVAEADFEPPFSNKLEQAGVTVWKQN  
KSEGASFYFLDPDGHKLELHVGS LAARLAACREKPYAGMVFTSDEA  
>GCA\_000390425

KAAFRRLSENGENYSVPPLRRQPPAVYGEHGVVYVHLFNVPRPARKTKGHVMLQSLNHLTLAVSDLQKSITFW  
HELLGLALHARWNTGAYLTCGDLWVCLSYDEARRNVPPQESDYTHYAFTVAEEDFKPFSQRLEQAGVTVWKQN  
KSEGASFYFLDPDGHKLELHVGS LAARLAACREKPYAGMVFTSDGA  
>GCA\_000818625

KAAFRRLSENGENYSVPPLRRQPPAVYGEHGVVYVHAFVTVSRPAQKTKGHVMLQSLNHLTLAVSDLQKSITFW  
HELLGLALHARWNTGAYLTCGDLWVCLSYDEARQYVPPQESDYTHYAFTVAEEDFEPPFSQRLEQAGVTVWKQN  
KSEGASFYFLDPDGHKLELHVGS LAARLAACREKPYAGMVFTSDGA  
>GCA\_000958735

KAAFRRLSENGENYSVPPLRRQPPAVYGEHGVVYFHAFVTVSRPARKTKGHVMLQSLNHLTLAVSDLQKSITFW  
HELLGLALHARWNTGAYLTCGDLWVCLSYDEARRYVPPQESDYTHYAFTVAEADFEPPFSQRLEQAGVTVWKQN  
KSEGASFYFLDPDGHKLELHVGS LAARLAACREKPYAGMVFTSDEA  
>GCA\_001022575

KAAFRRLSEYGENYSVPPLRRQPPAVYGEHGVVYVHLFTVPRPARKTKGHVMLQSLNHLTLAVSDLQKSITFW  
HELLGLALHARWNTGAYLTCGDLWVCLSYDDARQYVPPQESDYTHYAFTVAEADFEPPFSQRLEQAGVTVWKQN  
KSEGASFYFLDPDGHKLELHVGS LAARLAACREKPYAGMVFTSDEA  
>GCA\_000515295

KAAFRRLSENGENYSVPPLRRQPPAVYGEHGVVYVHLFTVPRPARKTKGHVMLQSLNHLTLAVSDLQKSITFW  
HELLGLALHARWNTGAYLTCGDLWVCLSYDEARQYVPPQESDYTHYAFTVAEEDFEPPFSHRLEQAGVTVWKQN  
KSEGASFYFLDPDGHKLELHVGS LAARLAACREKPYAGMVFTSDEA  
>GCA\_000692275

KAAFRRLSENEENYSVPPLRRQPPAVYGEHGVVYVHLFTVPRPARKTKGHVMLQSLNHLTLAVSDLQKSITFW  
HELLGLTLHARWNTGAYLTCGDLWVCLSYDEARQVPPQESDYTHYAFTVTEEDFEPPFSNKLEQAGATVWKQN  
KSEGASFYFLDPDGHKLELHVGS LAARLAACREKPYAGMVFTSDEA  
>GCA\_900075115

KAAFRRLSENGENYSVPPLRRQPPAVYGEHGVVYVHLFTVPCPARKTKGHVMLQSLNHLTLAVSDLQKSITFW  
HELLGLALHARWYTGAYLTCGDLWVCLSYDEARQYVPPQESDYTHYAFTVAEEDFEPPFSQRLEQAGVTVWKQN  
KSEGASFYFLDPDGHKLELQVGS LAARLAACREKPYAGMVFTSDEA  
>GCA\_900075645

KAAFRRLSENGENYSVPPLRRQPPAVYGEHGVVYVHLFTVPCPARKTKGHVMLQSLNHLTLAVSDLQKSITFW  
HELLGLTLHARWNTGAYLTCGDLWVCLSYDEARQYVPPQESDYTHYAFTVAEEDFEPPFSQRLEQAGVTVWKQN  
KSEGASFYFLDPDGHKLELHVGS LAARLAACREKPYAGMVFTSDEA  
>GCA\_000770155

KAAFRRLSENGENYSVPPLRRQPPAVYGEHGVVYVHAFTVSRPARKTKGHVMLQSLNHLTLAVSDLQKSVTFW  
HELLGLALHARWNTGAYLTCGDLWVCLSYDEARQYVPPQESDYTHYAFTVAEEDFEPFSSHRLEQAGVIVWKQN  
KSEGASFYFLDPDGHKLELHVGS LAARLAACREKPYAGMVFTSDGA  
>GCA\_900076025

KAAFRRLSENGENNSEPPLRRQPPAVYGEHGVVYVHLFTVSRPARKTKGLIMLQSLNHLTLAVSDLQKSITFW  
HELLGLTLHARWNTGAYLTCGDLWVCLSYDEARQYVPPQESDYTHYAFTVAEADFEFSSNKLEQAGVTVWKQN  
KSEGASFYFLDPDGHKLELHVGS LAARLAACREKPYAGMVFTSDEA  
>GCA\_900075565

KAAFRRLSENGENYSVPPLRRQPPAVYGEHGVVYVHLFTVSRPARKTKGHVMLQSLNHLTLAVSDLQKSVTFW  
HELLGLALHARWNTGAYLTCGDLWVCLSYDEARQYVPPQESDYTHYAFTVAEEDFEPFSSHRLEQAGVTVWKQN  
KSEGASFYFLDPDGHKLELHVGS LAARLAACREKPYAGMVFTSDGA  
>GCA\_900076935

KAAFRRLSENGENYSVPPLRRQPPAVYGEHGVVYVHLFTVPCPARKTKGHVMLQSLNHLTLAVSDLQKSVTFW  
HELLGLALHARWNTGAYLTCGDLWVCLSYDEARRVPPQESDYTHYAFTVAEADFEFSSQRLEQAGVTVWKQN  
KSEGASFYFLDPDGHKLELHVGS LAARLAACREKPYTGMVFTSDKA  
>GCA\_000692235

KAAFRRLSENGKNYSVPPLRRQPPAVYGKHGVVYVHAFTVSRPAQKTKGHVMLQSLNHLTLAVSDLQKSVTFW  
HELLGLTLHARWNTGAYLTCGDLWVCLSYDEARRVPPQESDYTHYAFTVAEEDFEPSSQRLEQAGVTVWKQN  
KSEGASFYFLDPDGHKLELHVGS LAARLAACREKPYAGMVFTSDEA  
>GCA\_900077795

KAAFRRLSENGENYSVPPLRRQPPAVYGEHGVVYVHLFTVPCPARKTKGHVMLQSLNHLTLAVSDLQKSVTFW  
HELLGLALHARWNTGAYLTCGDLWVCLSYDEARQYVPPQESDYTHYAFTVAEEDFEPSSQRLEQAGVTVWKQN  
KSEGASFYFLDPDGHKLELHVGS LAARLAACREKPYAGMVFTSDEA  
>GCA\_900078065

KAAFRRLSENGEYYSVPPLRRQPPAVYGEDGVVYVHLFTVPCPARKTKGHVMLQSLNHLTLAVSDLQKSVTFW  
HELLGLTLHARWNTGAYLTCGDLWVCLSYDEARQYVPPQESDYTHYAFTVAEADFEFSSQRLEQAGVTVWKQN  
KSEGASFYFLDPDGHKLELHVGS LAARLAACREKPYTGMVFTSDKA  
>GCA\_900077155

KAAFRRLSENGENISEPPLRRQPPAVYGEHGVVYVHLFTVSRPARKTKGLIMLQSLNHLTLAVSDLQKSITFW  
HELLGLTLHARWNTGAYLTCGDLWVCLSYDEARQYVPPQESDYTHYAFTVAEADFEFSSNKLEQAGVTVWKQN  
KSEGASFYFLDPDGHKLELHVGS LAARLAACREKPYAGMVFTSDEA  
>GCA\_000025565

KAAFRRLSENGENYSVPPLRRQPPAVYGEHGVVYVHAFTVSRPAQKTKGHVMLQSLNHLTLAVSDLQKSVTFW  
HELLGLALHARWNTGAYLTCGDLWVCLSYDEARRVPPQESDYTHYAFTVAEEDFEPSSHRLEQAGVTVWKQN  
KSEGASFYFLDPDGHKLELHVGS LAARLAACREKPYAGMVFTSDGA  
>GCA\_000534455

KAAFRRLSENGENYSVPPLRRQPPAVYGEHGVVYVHLFTVPRPARKTKGLVMLQSLNHLTLAVSDLQKSVTFW  
HELLGLPLHARWNTGAYLTCGDLWVCLSYDEARRVPPQESDYTHYAFTVTEEDFEPSSHRLEQAGVTVWKQN  
KSEGASFYFLDPDGHKLELHVGS LAARLAACREKPYAGMVFTSDGA  
>GCA\_900076515

KAAFRRLSENGEYYSVPPLRRQPPAVYGEDGVVYVHLFTVPRPARKTKGHVMLQSLNHLALAVSDLQKSVTFW  
HELLGLALHARWNTGAYLTCGDLWVCLSYDEARQYVPPQESDYTHYAFTVSEADFEFSSNKLEQAGITVWKQN  
KSEGASFYFLDPDGHKLELHVGS LAARLAACREKPYAGMVFTSDEA  
>GCA\_000286275

KAAFRRLSENGENNSEPPLRRQPPAVYGEHGVVYVHAFTVSRPARKTKGHIMLRSNHLTLAVSDLQKSITFW  
HELLGLTLHARWNTGAYLTCGDLWVCLSYDEARQNVPPQESDYTHYAFTVAEADFEFSSNKLEQAGVTVWKQN  
KSEGSSFYFLDPDGHKLELHVGS LAARLAACREKPYAGMVFTSDEA  
>GCA\_001525285

KPPFGGYLKNEENYSVPPLRRQPPAVYGEHGVVYVHAFTVSRPARKTKGHVMLQSLNHLTLAVSDLQKSVTFW  
HELLGLALHARWNTGAYLTCGDLWVCLSYDEARQYVPPQESDYTHYAFTVGEEDFEFSSQRLEQAGVTVWKQN  
KSEGASFYFLDPDGHKLELHVGS LAARLAACREKPYAGMVFTSDGA  
>GCA\_900077305



KAAFRRLSENGENYSVPPLRRQPPAVYGEHGVVYVHLFTVPRPARKTKGHVMLQSLNHLTLAVSDLQKSVTFW  
HELLGLTLHARWNTGAYLTCGDLWVCLSYDEARRNVPPQESDYTHYAFTVTEEDFVAFSQKLEQAGVTVWKQN  
KSEGASFYFLDPDGHKLELHVGS LAARLAACREKPYAGMVFTSDEA  
>GCA\_001011715

KAAFRRLSENGENYSVPPLRRQPPAVYGEHGVVYVHAF TVSRPAQKTKGHVMLQSLNHLTLAVSDLQKSVTFW  
HELLGLALHARWNTGAYLTCGDLWVCLSYDEARRNVPPQESDYTHYAFTVAEEDFEPF SHRLEQAGVTVWKQN  
KSEGASFYFLDPDGHKLELHVGS LAARLAACREKPYAGMVFTSDGA  
>GCA\_001472555

KPPFGGYLKNEENYSVPPLRRQPPAVYGEHVVVYVHAF TVSRPARKTKGHVMLQSLNHLTLAVSDLQKSVTFW  
HELLGLALHARWNTGAYLTCGDLWVCLSYDEARQYVPPQESDYTHYAFTVAEEDFEPF SHRLEQAGVTVWKQN  
KSEGASFYFLDPDGHKLELHVGS LAARLAACREKPYAGMVFTSDGA  
>GCA\_001187305

KAAFRRLSENGENYSVPPLRRQPPAVYGEHGVVYVHLFTVPRPARKTKGHVMLQSLNHLTLAVSDLQKSI SFW  
HELLGLTLHARWNTGAYLTCGDLWVCLSYDEARRVPPQESDYTHYAFTVAEADFEPF SHRLEQAGVTVWKQN  
KSEGASFYFLDPDGHKLELHVGS LAARLAACREKPYAGMVFTSDEA  
>GCA\_000952315

KAAFRRLSENGKNYSVPPLRRQPPAVYGEHGVVYVHLFTVPRPARKTKGHVMLQSLNHLTLAVSDLQKSVTFW  
HELLGLTLHARWNTGAYLTCGDLWVCLSYDEARRVPPQESDYTHYAFTVAEADFEPF SQRFEQAGVTVWKQN  
KSEGASFYFLDPDGHKLELHVGS LAARLAACREKPYAGMVFTSDEA  
>GCA\_900077215

KAAFRRLSENGENYSVPPLRRQPPAVYGEHGVVYVHLFTVSRPARKTKGHVMLQSLNHLTLAVSDLQKSVTFW  
HELLGLALHARWNTGAYLTCGDLWVCLSYDEARQYVPPQESDYTHYAFTVAEADFESF SHRLEQAGVTVWKQN  
KSEGASFYFLDPDGHKLELHVGS LAARLAACREKPYAGMVFTSDEA  
>GCA\_900050915

KAAFRRLSENVENYSVPPLRRQPPAVYGEHGVVYVHAF TVSRPAQKTKGHVMLQSLNHLTLAVSDLQKSVTFW  
HELLGLALHARWNTGAYLTCGDLWVCLSYDEARRNVPPQESDYTHYAFTVAEEDFEPF SHRLEQAGVTVWKQN  
KSEGASFYFLDPDGHKLELHVGS LAARLAACREKPYAGMVFTSDGA  
>GCA\_900075125

KAAFRRLSENGENNSVPPLRRQPPAVYGEHGVVYVHLFTVPCPARKKKGHVMLQSLNHLTLAVSDLQKSVTFW  
HELLGLALHARWNTGAYLTCGDLWVCLSYDEARQYVPPQESDYTHYAFTVAEEDFEPF SQRLEQAGVTVWKQN  
KSEGASFYFLDPDGHKLELHVGS LAARLAACREKPYAGMVFTSDEA  
>GCA\_000692315

KAAFRRLSENGENYSVPPLRRQPPAVYGEHGVVYVHLFTVPCPARKTKGHVMLQSLNHLTLAVSDLQKSVTFW  
HELLGLALHARWNTGAYLTCGDLWVCLSYDEARQYVPPQESDYTHYAFTVAEEDFEPF SQRLEQAGVTVWKQN  
KSEGASFYFLDPDGHKLELQVGS LAARLAACREKPYAGMVFTSDEA  
>GCA\_900077005

KAAFRRLSENGENYSVPPLRRQPPAVYGEDGVVYVHLFTVSRPARKTKGHVMLQSLNHLTLAVSNLQKSVTFW  
HELLGLALHARWNTGAYLTCGDLWVCLSYDEARQYVPPQESDYTHYAFTVAEADFEPF SQKLEQAGVTVWKQN  
KSEGASFYFLDPDGHKLELHVGS LAARLAACREKPYAGMVFTSDEA  
>GCA\_900075195

KAAFRRLSENGKNYSAPPLRRQPPAVYGEHGVVYVHLFTVSRPARKTKGHVMLQSLNHLTLAVSDLQKSVTFW  
HELLGLALHARWNTGAYLTCGDLWVCLSYDEARQYVPPQESDYTHYAFTVAEEDFEPF SHRLEQAGVTVWKQN  
KSEGASFYFLDPDGHKLELHVGS LAARLAACREKPYAGMVFTSDGA  
>GCA\_900076275

KAAFRRLSENGEYYSVPPLRRQPPAVYGEDGVVYVHLFTVPRPARKTKGHVMLQSLNHLTLAVSDLQKSVTFW  
HELLGLALHARWNTGAYLTCGDLWVCLSYDEARQYVPPQESDYTHYAFTVSEADFEPF SNKLEQAGITVWKQN  
KSEGASFYFLDPDGHKLELHVGS LAARLAACREKTYAGMVFTSDEA  
>GCA\_000958205

KAAFRRLSENGENYSVPPLRRQPPAVYGEHGVVYVHAF TVSRPARKTKGHVMLQSLNHLTLAVSDLQKSVTFW  
HELLGLALHARWNTGAYLTCGDLWVCLSYDEARRNVPPQESDYTHYAFTVAEEDFEPF SQRLEQAGVTVWKQN  
KSEGASFYFLDPDGHKLELHVGS LAARLAACREKPYAGMVFTSDEA  
>GCA\_001472895

KAAFRRLSENGENYSVPPLRRQPPAVYGEHGVVYVHAFTVSRPAQKTKGHVMLQSLNHLTLAVSDLQKSVTFW  
HELLGLALHARWNTGAYLTCGDLWVCLSYDEARQYVPPQESDYTHYAFTVAEEDFEPF SHRLEQAGVTVWKQN  
KSEGASFYFLDPDGHKLELHVGS LAARLAACREKPYAGMVFTSDGA  
>GCA\_000966095

KAAFRRLSENGKNYSVPPLRRQPPAVYGEHGVVYVHLFTVPRPARKTKGHVMLQSLNHLTLAVSDLQKSVTFW  
HELLGLALHARWNTGAYLTCGDLWVCLSYDEARRNVPPQESDYTHYAFTVAEDDFEPF SHRLEQAGVTVWKQN  
KSEGASFYFLDPDGHKLELHVGS LAARLAACREKPYAGMVFTSDGA  
>GCA\_001190105

KAAFRRLSENGENNSEPPPLRRQPPAVYGEHGVVYVHGLFTVSRPARKTKGHVMLQSLNHLTLAVSDLQKSITFW  
HELLGLTLHARWNTGAYLTCGDLWVCLSYDEARQYVPPQESDYTHYAFTVAEADDFEPF SHRLEQAGVTVWKQN  
KSEGASFYFLDPDGHKLELHVGS LAARLAACREKPYAGMVFTSDEA  
>GCA\_000492715

KAAFRRLSENGENYSVPPLRRQPPAVYGEDGVVYVHAFTVSRPARKTKGHVMLQSLNHLTLAVSDLQKSVTFW  
HELLGLALHARWNTGAYLTCGDLWVCLSYDEARQYVPPQESDYTHYAFTVTEEDFEPF SHRLEQAGVTVWKQN  
KSEGASFYFLDPDGHKLELHVGS LAARLAACREKPYAGMVFTSDEA  
>GCA\_000512375

KAAFRRLSENGENYSMPPLRRQPPAVYGEHGVVYVHEVTVPRLAQKTKGHVMLQSLNHLTLAVSDLQKSVTFW  
HELLGLTLHARWNTGAYLTCGDLWVCLSYDEARGYVPPQESDYTHYAFTVAEEDFEPF SHKLEQAGVTVWKQN  
KSEGASFYFLDPDGHKLELHVGS LAARLAACREKPYAGMVFTSDEA  
>GCA\_001487035

KAAFRRLSENGENYSVPPLRRQPPAVYGEHGVVYVHLFTVPRPARKTKGLVMLQSLNHLTLAVSDLQKSVTFW  
HELLGLPLHARWNTGAYLTCGDLWVCLSFDEARQYVPPQESDYTHYAFTVTEEDFEPF SHRLEQAGVTVWKQN  
KSEGASFYFLDPDGHKLELHVGS LAARLAACREKPYSGMVFTSDEA  
>GCA\_001631195

KAAFRRLSENGENYSVPPLRRQPPAVYGEHGVVYVHFFTVSRPARKSKGHVMLQSLNHLTLAVSDLQKSVTFW  
HELLGLALHARWNTGAYLTCGDLWVCLSYDEARRVPPQESDYTHYAFTVSEADDFEPFSQRLEQAGVTVWKQN  
KSEGASFYFLDPDGHKLELHVGS LAARLAACREKPYAGMVFTSDEA  
>GCA\_000958805

KAAFRRLSENGEYYSVPPLRRQPPAVYGEDGVVYVHLFTVPRPARKTKGHVMLQSLNHLTLAVSDLQKSVTFW  
HELLGLALHARWNTGAYLTCGDLWVCLSYDEARQYVPPQESDYTHYAFTVSEADDFEPFSNKLEQAGITVWKQN  
KSEGASFYFLDPDGHKLELHVGS LAARLAACREKPYAGMVFTSDEA  
>GCA\_000315775

KAAFRRLSENGKNYSVPPLRRQPPAVYGEDGVVYVHLFTVPRPARKTKGHVMLQSLNHLTLAVSDLQKSVTFW  
HELLGLTLHARWNTGAYLTCGDLWVCLSYDEARRYVPPQESDYTHYAFTVAEEDFEPFSQRLEQAGVTVWKQN  
KSEGASFYFLDPDGHKLELHVGS LAARLAACREKPYAGMLFTSDEA  
>GCA\_001055365

KAAFRRLSENGENYSVPPLRRQPPAVYGEHGVVYVHAFTVSRPARKTKGHVMLQSLNHLTLAVSDLQKSVTFW  
HELLGLALHARWNTGAYLTCGDLWVCLSYDEARQYVPPQESDYTHYAFTVAEEDFEPF SHRLEQAGVTVWKQN  
KSEGASFYFLDPDGHKLELHVGS LAARLAACREKPYAGMVFTSDGA  
>GCA\_000784905

KAAFRRLSENGKNYSAPPLRRQPPAVYGEHGVVYVHAFTVSRPARKIKGHVMLQSLNHLTLAVSDLQKSVTFW  
HELLGLTLHARWNTGAYLTCGDLWVCLSYDEARQYVPPQESDYTHYAFTVAEEDFEPPLSQRLEQAGVTIWKQN  
KSEGASFYFLDPDGHKLELHVGS LAARLAACREKPYAGMVFTSDEA  
>GCA\_001022695

KAAFRRLSENGENYSVPPLRRQPPAVYGEHGVVYVHAFTVSRPARKTKGHVMLQSLNHLTLAVSDLQKSVTFW  
HELLGLALHARWNTGAYLTCGDLWVCLSYDEARQYVPPQESDYTHYAFTVAEEDFEPF SHRLEQAGITVWKQN  
KSEGASFYFLDPDGHKLELHVGS LAARLAACREKPYAGMVFTSDEA  
>GCA\_000952605

KAAFRRLSENGENYSVPPLRRQPPAVYGEHGVVYVHAFTVSRPARKTKGHVMLQSLNHLTLAVSDLQKSVTFW  
HELLGLTLHARWNTGAYLTCGDLWVCLSYDEAREYVPPQESDYTHYAFTVAEADDFEPFSQRLEQAGVTVWKQN  
KSEGASFYFLDPDGHKLELHVGS LAARLAACREKPYAGMVFTSDEA  
>GCA\_000530005

VKAAFRRLENGENYSVPPLRRQPPAVYGEDGVVYVHAFTVPRPARKTKGHVMLQSLNHLTIAVSDLQKSVTF  
WHALLGLTLHARWNTGAYLTCGELWVCLSYDEARRYVPPQESDYTHYAFTVAEEDFEFQSQRLEQAGVTVWKQ  
NKSEGASFYFLDPDGHKLELHVGS LAARLAACREKPYA  
>GCA\_001006645  
ENYSVPPLRRQPPAVYGEHGVVYVHLFTVSRPARKTKGHVMLQSLNHLTLAVSDLQKSVTFWHELLGLLHAR  
WNTGAYLTCGDLWVCLSYDEARRVPPQESDYTHYAFTVSEADFEFQSQRLEQAGVTVWKQNKSEGASFYLLD  
PDGHKLELHVGS LAARLAACREKPYAGMVFTSDEA  
>GCA\_000264705  
NYSMPPLRRQPPAVYGEHGVVYVHLFTVPRPARKTKGHVMLQSLNHLTLAVSDLQKSVTFWHELLGLLHARW  
NTGAYLTCGELWVCLSYDEARQYVPPQESDYTHYAFTVAEEDFEFQSQRLEQAGVTVWKQNKSEGASFYFLDP  
DGHKLELHVGS LAARLAACREKPYAGMVFTSDEA  
>GCA\_900075785  
LRRQPPAVYGEHGVVYVHLITVSRPARKTKGHVMLQSLNHLTLAVSDLQKSVTFWHELLGLLHARWNTGAYL  
TCGDLWVCLSYDEARQYVPPQESDYTHYAFTVAEADFEAFSQRLEQAGVIVWKQNKSEGASFYFLDPDGHKLE  
LHVGS LAARLAACREKPYAGMVFTSDGA  
>GCA\_900075885  
LRRQPPAVYGEHGVVYVHLFTVPRPARKTKGHVMLQSLNHLTLAVSDLQKSVTFWHELLGLLHARWNTGAYL  
TCGELWVCLSYDEARQYVPPQESDYTHYAFTVAEEDFEPLSQRLEQAGVTVWKQNKSEGASFYFLDPDGHKLE  
LHVGS LAARLAACREKPYAGMVFTSDGA  
>GCA\_900076925  
LRRQPPAVYGEHGVVYVHLFTVPRPARKTKGHVMLQSLNHLTLAVSDLQKSVTFWHELLGLLHARWNTGAYL  
TCGDLWVCLSYDEARQYVPPQESDYTHYAFTVAEEDFEPLSQRLEQAGVTVWKQNKSEGASFYFLDPDGHKLE  
LHVGS LAARLAACREKPYAGMVFTSDEA  
>GCA\_900077575  
LRRQPPAVYGEHGVVYVHLITVSRPARKTKGHVMLQSLNHLTLAVSDLQKSVTFWHELLGLLHARWNTGAYL  
TCGDLWVCLSYDEARQYVPPQESDYTHYAFTVAEADFEPLSQRLEQAGVTVWKQNKSEGASFYFLDPDGHKLE  
LHVGS LAARLAACREKPYAGMVFTSDGA  
>GCA\_001052795  
IMRTYKNKEELKKEINRTYTKYILEFETIPEELKDKRVEEVDRTPAENLAYQVGWTNLILKWENDERNGLSVK  
TPSDQFKWNQLGELYKWFNTY AHLPLKELEEILNRNID D INMMIDSMSDEDLFTAHKRWKWADEATKTAVWEV  
YKFIHVNTVAPFGTFRTKIRKWKRLAL  
>GCA\_900143315  
MRTYESKEALIEAIQIASQKYLAEFAEI PETLKDHR IETVAKTPSENLAYQLGWLNLLLSWEEQEQRGLTVQT  
PAEGYKWNQLGALYQSFYQAYGQMSLESQ LIALQDTLEKLLHWIDSLSEDELFLPQQRAWATTKAQWPLWKWI  
HINSVAPFTSFRTQIRKWKKACL  
>GCA\_000686165  
VKAAFRRLENGKNYSVPPLGRQPPAVYGEHGVVYVHLFTVPRPARKTKGHVMLQSLNHLTLAVSDLQKSVSF  
WHELLGLLHARWNTGAYLTCGDLWVCLSYDEARQYVPPQESDYTHYAFTVAEEDYEVEFSQRLEQAGVTVWKQ  
NKSEGRRSIFSTRTG  
>GCA\_000948705  
YVHEVTVPRLAQKTKGHVMLQSLNHLTLAVSDLQKSVTFWHELLGLLHARWNTGAYLTCGDLWVCLSYDEAR  
GYVPPQESDYTHYAFTVAEEDFEFQSHKLEQAGVTVWKQNKSEGASFYFLDPDGHKLELHVGS LAARLAACRE  
KPYAGMVFTSDEA  
>GCA\_900076285  
LYRITSGAKNKRHVMLQSLNHLTLAVSDLQKSVTFWHELLGLLHARWNTGAYLTCGDLWVCLSYDEARQYVP  
PQESDYTHYAFTVTEEDFEFQSQRLEQAGVTVWKQNKSEGASFYFLDPDGHKLELHVGS LAARLAACREKPYA  
GMVFTSDEA  
>GCA\_000389255  
MLQSLNHLTLAVSNLQTS LTFWRDLLGLQLHAEWDTGASLPCGALWVCLSYDVSHLTCGDLWVCLSYDVSRNY  
VAPQESDYTHYAFS IAPEDFEFQSC LKQAGVTVWKDNKSEGQSFYFLDPDGHKLELHVGD LASRLTQCREKP  
YSGMRF  
>GCA\_001078175

MLSGLNHLTLAVSQLAPSVAFYQQLPGMTLHARWDNGAYFSCGDLWLCLSLDPQRRVTPPEESDYTHYAFSIA  
EEDFALFVGRNLAAGVPVWKTNKSEGASHYFLDPDGHKLELHVGNLAQRLAACRAKPYKGMVFFGEDEQAAGN  
P  
>GCA\_001030775  
MLSGLNHLTLAVSQLAPSVAFYQQLPGMTLRARWDNGAYFSCGDLWLCLSLDPQRRVTPPEESDYTHYAFSIA  
EADFALFAGRLNAAGVPVWKTNKSEGASHYFLDPDGHKLELHVGNLAQRLAACRAKPYKGMVFFGEDEQAAGN  
P  
>GCA\_900083885  
MLSGLNHLTLAVSQLAPSVAFYQQLPGMTLRARWDNGAYFSCGDLWLCLSLDPQRRVISPEESDYTHYAFSIA  
EADFALFAGRLNAAGVPVWKTNKSEGASHYFLDPDGHKLELHVGNLAQRLAACRAKPYKGMVFFGEDEQAAWN  
P  
>GCA\_900083605  
MLSGLNHLTLAVSQLAPSVAFYQQLPGMTLHARWDNGAYFSCGDLWLCLSLDPQRRVTPPEESDYTHYAFSIA  
EEDFALFAGRLNAAGVPVWKTNKSEGASHYFLDPDGHKLELHVGNLARRLAACREKPYKGMVFFGEDEQTVGN  
P  
>GCA\_900083695  
MLSGLNHLTLAVSQLAPSVAFYQQLPGMTLRARWDNGAYFSCGDLWLCLSLDPQRRVTPPEESDYTHYAFSIA  
EEDFAVFAGRLNAAGVPVWKTNKSEGASHYFLDPDGHKLELHVGS LAQRLAACRAKPYKGMVFFGEDEQTAGN  
P  
>GCA\_000507385  
MLSGLNHLTLAVSQLAPSVAFYQQLPGMTLRARWDNGAYFSCGDLWLCLSLDPQRRVISPEESDYTHYAFSIA  
EADFALFAGRLNAAGVPVWKTNKSEGASHYFLDPDGHKLELHVGNLAQRLAACRKQPYKGMVFFGEDEQAAGN  
P  
>GCA\_900075735  
KAKGHVMLQSLNHLTLAVSDLQKSVTFWHELLGLTLHARWNTGAYLTCGDLWVCLSYDEARQYVPPQESDYTH  
YAFTVAEADFAPFSHRLEQAGVTVWKQNK SAGASYFLDPDGHKLELHVGS LAARLAACREKPYAGMVFTSDE  
A  
>GCA\_900083635  
MLSGLNHLTLAVSQLAPSVAFYQQLPGMTLRARWDK GAYFSCGDLWLCLSLDPQRRVISPEESDYTHYAFSIA  
EADFALFAGRLNAAGVPVWKTNKSEGASHYFLDPDGHKLELHVGNLAQRLAACRKQPYKGMVFFGEDEQAAGN  
P  
>GCA\_001548355  
MLSGLNHLTLAVSQLAPSVAFYQQLPGMTLHARWDNGAYFSCGDLWLCLSLDPQRRVTPPEESDYTHYAFSIA  
EEDFALFAGRLNAAGVPVWKTNKSEGASHYFLDPDGHKLELHVGNLARRLAACREKPYKGMVFFGEDEQTAGN  
P  
>GCA\_900083565  
MLSGLNHLTLAVSQLAPSVAFYQQLPGMTLRARWDNGAYFSCGDLWLCLSLDPQRRVISPEESDYTHYAFSIA  
EADFALVVGRLNAAGVPVWKTNKSEGASHYFLDPDGHKLELHVGNLAQRLAACRAKPYKGMVFFGEDEQAAGN  
P  
>GCA\_900083575  
MLSGLNHLTLAVSQLAPSVAFYQQLPGMTLRARWDNGAYFSCGDLWLCLSLDPQRRVISPEESDYTHYAFSIA  
EADFALFAGRLNAAGVPVWKTNKSEGASHYFLDPDGHKLELHVGNLAQRLAACRAKPYKGMVFFGEDEQAAGN  
P  
>GCA\_900083625  
MLSGLNHLTLAVSQLAPSVAFYQQLPGMTLRARWDNGAYFSCGDLWLCLSLDPQRRVTPPEESDYTHYAFSIA  
EEDFALFVGRNLAAGVPVWKTNKSEGASHYFLDPDGHKLELHVGNLAQRLAACRAKPYKGMVFFGKDEQAAGN  
P  
>GCA\_900083825  
MLSGLNHLTLAVSQLAPSVAFYQQLPGMTLRARWDNGAYFSCGDLWLCLSLDPQRRVISPEESDYTHYAFSIA  
EADFALVVGRLNAAGVPVWKTNKSEGASHYFLDPDGHKLELHVGNLAQRLAACRKQPYKGMVFFGEDEQAAGN  
P  
>GCA\_001065715

MLSGLNHLTLAVSQLAPSVAFYQQLPGMTLRARWDKGAYFSCGDLWLCLSLDPQRRVTPPEESDYTHYAFSIA  
EADFALFAGRLNAAGVPVWKTNKSEGASHYFLDPDGHKLELHVGNLAQRLAACRAKPYKGMVFFGEDEQTAGN  
P  
>GCA\_001594375  
MLSGLNHLTLAVSQLAPSVAFYQQLPGMTLRARWDNGAYFSCGDLWLCLSLDPQRRVTPPEESDYTHYAFSIA  
EADFALFAGRLNAAGVPVWKTNKSEGASHYFLDPDGHKLELHVGNLAQRLAACRAKPYKGMVFFGEDEQAAGD  
P  
>GCA\_000247855  
MLSGLNHLTLAVSQLAPSVAFYQQLPGMTLRARWDKGAYFSCGDLWLCLSLDPQRRVTPPEESDYTHYAFSIA  
EADFALFAGRLNAAGVPVWKTNKSEGASHYFLDPDGHKLELHVGNLAQRLAACRAKPYKGMVFFGEDEQAAGN  
P  
>GCA\_900084875  
MLSGLNHLTLAVSQLAPSVAFYQQLGMTLHARWDSGAYLSCGDLWLCLSLDPQRRVTPPEESDYTHYAFSIS  
EADFARFAARLEVVGVAVWKLNRSEGASHYFLDPDGHKLELHVGSQAQRLAACREQPYKGMVFFDDEVITGN  
>GCA\_001631845  
MLSGLNHLTLAVSQLAPSVAFYHQLLGMTLHARWDSGAYLSCGDLWLCLSLDPQRRVTPPEESDYTHYAFSIS  
EADFASFAARLEAAGVAVWKLNRSEGESHYFLDPDGHKLELHVGSQAQRLAACREQPYKGMVFFFEDEVVTGN  
>GCA\_000281755  
MLSGLNHLTLAVSQLAPSVAFYQQLGMTLHARWDSGAYLSCGDLWLCLSLDPQRRVTPPEESDYTHYAFSIS  
EADFASFAARLEAAGVAIWKLNRSEGASHYFLDPDGHKLELHVGSQAQRLAACREQPYKGMVFFFEDEVVTGN  
>GCA\_001052235  
MLSGLNHLTLAVSQLAPSVAFYQQLPGMTLHARWDNGAYFSCGDLWLCLSLDPQRRVTPPEESDYTHYAFSIA  
EEDFALFAGRLNAAGVPVWKTNKSEGASHYFLDPDGHKLELHVGNLARRLAACREKPYKGMVFLARTNRRPGT  
>GCA\_000492795  
MLSGLNHLTLAVSQLAPSVAFYQQLGMTLHARWDSGAYLSCGDLWLCLSLDPQRRVTPPEESDYTHYAFSIS  
EADFARFAARLEVAGVAVWKLNRSEGASHYFLDPDGHKLELHVGSQAQRLAACREQPYKGMVFFDDEVVTGN  
>GCA\_000567605  
MLSGLNHLTLAVSQLAPSVAFYQQLGMTLHARWDSGAYLSCGDLWLCLSLDPQRRITPPEESDYTHYAFSIS  
EADFASFAARLEVAGVAVWKLNRSEGASHYFLDPDGHKLELHVGSQAQRLAACREQPYKGMVFFFEDEVVTGN  
>GCA\_000693035  
MLSGLNHLTLAVSQLAPSVAFYQQQLGMTLHARWDSGAYLSCGDLWLCLSLDPQRRVTPPEESDYTHYAFSIS  
EADFARFAARLEVAGVAVWKLNRSEGASHYFLDPDGHKLELHVGSQAQRLAACREQPYKGMVFFDDEVVTGN  
>GCA\_000493135  
MLSGLNHLTLAVSQLAPSVAFYQQLGMTLHARWDSGAYLSCGDLWLCLSLDPQRRVTPPEESDYTHYAFSIS  
EADFASFAARLEAAGVAIWKLNRSEGASHYFLDPDGHKLELHVGSQAQRLAACREQPYKGMVFFFAEQGALG  
>GCA\_000822465  
MLSGLNHLTLAVSQLAPSVAFYQQQLGMTLHARWDSGAYLSCGDLWLCLSLDPQRRVTPPEESDYTHYAFSIS  
EADFASFAARLEAAGVAVWKLNRSEGASHYFLDPDGHKLELHVGSQAQRLAACREQPYKGMVFFFAEQGALG  
>GCA\_001457255  
MLSGLNHLTLAVSQLAQSVAFYQQLGMTLHARWDSGAYLSCGDLWLCLSLDPQRRVTPPEESDYTHYAFSIS  
EADFASFAARLEAAGVAVWKLNRSEGASHYFLDPDGHKLELHVGSQAQRLAACREQPYKGMVFFFAEQGALG  
>GCA\_000821705  
MLSGLNHLTLAVSQLAPSVAFYQQLGMTLHARWDSGAYLSCGDLWLCLSLDPQRRVTPPEESDYTHYAFSIS  
EADFASFAARLEAAGVAIWKLNRSEGASHYFLDPDGHKLELHVGSQAQRLAACREQPYKGMVFFDDEQGALG  
>GCA\_000565135  
MLSGLNHLTLAVSQLAPSVAFYQQLGMTLHARWDSGAYLSCGDLWLCLSLDPQRRVTPPEESDYTHYAFSIS  
EADFASFAARLEVAGVAVWKLNRSEGASHYFLDPDGHKLELHVGSQAQRLAACREQPYKGMVFFDDEQGALG  
>GCA\_000950145  
MLSGLNHLTLAVSQLAPSVAFIISYARCTRAGIAARI FPAAICGCACRWIPQRRVTPPEESDYTHYAFSISE  
ADFASFAARLEVAGVAVWKLNRSEGESHYFLDPDGHKLELHVGNLAQRLAACREQPYKGMVFFGE  
>GCA\_000492435  
GHVMLQSLNHLTLAVSDLQKSVTFWHELLGLTLHARWNTGAYLTCGDLWVCLSYDEARRYVPPQESDYTHYAF  
TVTEEDFEPFSQRLEQAGVTWVKQNKSEGASFYFLDPDGHKLELHVGSQAARLAACREKPYAGMVFTSDGA  
>GCA\_900076565

GHVMLQSLNHLTLAVSDLQKSVTFWHELLGLTLHARWNTGAYLTCGDLWVCLSYDEARRVPPQESDYTHYAF  
TVAEADFEPPFSQRLEQAGVTVWKQNKSEGASFYFLDPDGHKLELHVGSLAARLAACREKPYAGMVFTSDKA  
>GCA\_001270135  
GHVMLQSLNHLTLAVSDLQKSVTFWHELLGLTLHARWNTGAYLTCGDLWVCLSYDEARRVPPQESDYTHYAF  
TAAEEDFEPPFSQRLEQAGVTVWKQNKSEGASFYFLDPDGHKLELHVGSLAARLAACREKPYAGMVFTSNEA  
>GCA\_900078165  
GHVMLQSLNHLTLAVSDLQKSVTFWHELLGLTLHARWNTGAYLTCGDLWICLSYDEARRVPPQESDYTHYAF  
TVAEADFEPPFSQMLEQAGVTVWKQNKSEGASFYFLDPDGHKLELHVGSLAARLAACREKPYAGMVFTSDEA  
>GCA\_900075235  
GHVMLQSLNHLTLAVSDLQKSVTFWHELLGLLALHARWNTGAYLTCGDLWVCLSYDEAHRVPPQESDYTHYAF  
TVAEEDFEPPFSQRLEQAGVTVWKQNKSEGASFYFLDPDGHKLELHVGSLAARLAACREKPYAGMVFTSDEA  
>GCA\_001631365  
GHVMLQSLNHLTLAVSDLQKSVTFWHELLGLLALHARWNTGAYLTCGDLWVCLSYDEARQYVPPQESDYTHYAF  
TVAEEDFEPPFSQRLEQAGVTVWKQNKSEGASFYFLDPDGHKLELHMGSLAARLAACREKPYAGMVFTSDEA  
>GCA\_900077405  
GHVMLQSLNHLTLAVSDLQKSVTFWHELLGLTLHARWNTGAYLTCGDLWVCLSYDEARQYVPPQESDYTHYAF  
TVAEEDFEPPFSQRLEQAGVTVWKQNKSEGASFYFLDPDGHKLELHVGSLAARLAACREKPYAGMVFTSDEA  
>GCA\_001055165  
GHVMLQSLNHLTLAVSDLQKSVTFWHELLGLTLHARWNTGAYLTCGDLWVCLSYDEARQYVPPQESDYTHYAF  
TVAEAEFEPPFSNKLEQAGVIVWKQNKSEGASFYFLDPDGHKLELHVGSLAARLAACREKPYAGMVFTSDEA  
>GCA\_000492675  
GHVMLQSLNHLTLAVSDLQKSVTFWHELLGLLALHAHWNTGAYLTCGDLWVCLSYDEARQFVPPQESDYTHYAF  
TVAEADFEPPFSQRLEQAGVTVWKQNKSEGASFYFLDPDGHKLELHVGSLAARLAACREKPYAGMVFTSDEA  
>GCA\_000783855  
GHVMLQSLNHLTLAVSDLQKSVTFWHELLGLLALHARWNTGAYLTCGDLWVCLSYDEARRVPPQESDYTHYAF  
TVAEADFEPPFSQRLEQAGVTVWKQNKSEGASFYFLDPDGHKLELHVGSLAARLAACREKPYAGMVFTSDEA  
>GCA\_900075915  
GHVMLQSLNHLTLAVSDLQKSVTFWHELLGLTLHARWNTGAYLTCGDLWVCLSYDEARQYVPPQESDYTHYAF  
TVAEADFEPPFSQRLEQADVTVWKQNKSEGASFYFLDPDGHKLELHVGSLAARLAACREKPYAGMVFTSDKA  
>GCA\_900077895  
GHVMLQSLNHLTLAVSDLQKSVTFWHELLGLLALHARWNTGAYLTCGDLWVCLSYDEARQYVPPQESDYTHYAF  
TVAEEDFEPPFSQRLEQAGVTVWKQNKSEGASFYFLDPDGHKLELHVGSLAARLAACHEKPYAGMVFTSDEA  
>GCA\_900076035  
GHVMLQSLNHLTLAVSDLQKSVTFWHELLGLLALHARWNTGAYLTCGDLWVCLSYDEARRVPPQESDYTHYAF  
TVAEADFEPPFSQRLEQAGVTVWKQNKSEGASFYFLDPDGHKLELHVGSLAARLAACREKPYAGMVFTSDGA  
>GCA\_000492575  
GHVMLQSLNHLTLAVSDLQKSVTFWHELLGLLALHARWNTGAYLTCGDLWVCLSYDEARQYVPPQESDYTHYAF  
TVAEEDFEPPFSQRLEQAGVTVWKQNKSEGASFYFLDPDGHKLELHVGSLAARLAACREKPYAGMVFTSDEA  
>GCA\_000770295  
MLTGMNHLTLAVTDLDRSLHFYRDIKMTLHTRWKYGAYLTCGELWICLSADPEIIHRPIHQGYTHYAFTLPP  
EQFPFRSLLAAHQITLWKRNRSEGDSVYFLDPDGHQLEAHSGGIQQRLDacreapyeemifpapgqinv  
>GCA\_000966695  
MLTGMNHLTLAVADLDRSLHFYRDIKMTLHTRWKYGAYLTCGELWICLSADPEIIHRPIHQGYTHYAFTLPP  
EQFPFRSLLAAHQITLWKRNRSEGDSIYFLDPDGHQLEAHSGGIQQRLDacreapyeemifpapgqinv  
>GCA\_900142745  
MLTGMNHLTLAVADLDRSLHFYHDIKMTLHTRWKYGAYLTCGELWICLSADPEIIHRPIHQGYTHYAFTLPP  
EQFPFRSLLAAHQITLWKRNRSEGDSVYFLDPDGHQLEAHSGGIQQRLDacreapyeemifpapgqinv  
>GCA\_001006565  
MLTGINHLLTLAVADLDRSLHFYHGILEMTLHARWKYGAYLTCGDLWICLSADPEIIHRPVHQGYTHYAFTLPP  
ERFPFRALLASHQITLWKHNRSEGDSVYFLDPDGHQLEAHSGGIQQRLNacreapyeemifpptgqinv  
>GCA\_001462885  
MLSGLNHLTLAVSQAAPSVAFYQQLLGMTLHARWDSGAYLSCGDLWLCLSLDPQRRITPPEESDYTHYAFSIS  
EADFASFAARLEAAGVAIWKLNRSEGASHYFLDPDGHKLELHVGSLAQRLAACREQPYKGMVFFDEQGA  
>GCA\_001870615

MLSGLNHLTLAVSQAAPSVAFYQQLLGMTLHARWDSGAYLSCGDLWLCLSLDPQRRVTPPEESDYTHYAFSIS  
EADFASFAARLEVAGVAVWKLNRSEGASHYFLDPDGHKLELHVAVLPSGWPPAANSRIRGWCFLLISEAAS  
>GCA\_000694455

MLSGLNHLTLAVSQAQAAPSVAFYQQLLGMTLHARWDSGAYLSCGDLWLCLSLDPQRRVTPPEESDYTHYAFSIS  
EADFASFAARLEAAGVAVWKLNRSEGASHYFLDPDGHKLELHVGSQAQRLAACREQPYKGMVFFDEQGA  
>GCA\_001274995

MLTGINHLTLAVADLDRSLHFYHGILEMTLHARWKYGAYLTCGELWICLSADPEIIHRPVHQGYTHYAFTLPP  
ERFPAPFRALLASHQITLWKHNRSEGDSVYFLDPDGHQLEAHSGGITQRLNACREAPYEEMIFPPTGQINV  
>GCA\_000223435

MLSGLNHLTLAVSQAAPSVAFYQQLLGMTLHARWDSGAYLSCGDLWLCLSLDPQRRVTPPEESDYTHYAFSIS  
EADFASFAARLEAAGVAIWKLNRSEGASHYFLDPDGHKLELHVGSQAQRLAACREQPYKGMVFFDEQGA  
>GCA\_001879345

MLSGLNHLTLAVSQAAPSVAFYQQLLGMTLHARWDSGAYLSCGDLWLCLSLDPQRRVTPPEESDYTHYAFSIS  
EADFASFAARLEAAGVAVWKLNRSEGASHYFLDPDGHKLELHVAVSPSGWPPAASSRIRGWCFLLNSEAAT  
>GCA\_900083615

MLSGLNHLTLAVSQAAPSVAFYQQLPGMTLRARWDKGYFSCGDLWLCLSLDPQRRVTPPEESDYTHYAFSIA  
EADFALFAGRLNAAGVPVWKTNKSEGASHYFLDPDGHKLELHVGNLAQRLAACRAKPYKGMVFFGEDEQ  
>GCA\_000269585

MLSGLNHLTLAVSQAAPSVAFYQQLPGMTLRARWDNGAYFSCGDLWLCLSLDPQRRVTPPEESDYTHYAFSIA  
EADFALFAGRLNAAGVPVWKTNKSEGASHYFLDPDGHKLELHVGNLAQRLAACRAKPYKGMVFFGEDEQ  
>GCA\_001879415

MLSGLNHLTLAVSQAAPSVAFYQQLLGMTLHARWDSGAYLSCGDLWLCLSLDPQRRVTPPEESDYTHYAFSIS  
EADFASFAARLEAAGVAVWKLNRSEGASHYFLDPDGHKLELHVAVSPSGWPPAASSRIRGWCFLLNSEAA  
>GCA\_001674985

MLSGLNHLTLAVSQAAPSVAFYQQLLGMTLHARWDSGAYLSCGDLWLCLSLDPQRRVTPPEESDYTHYAFSIS  
EADFASFAARLEAAGVAIWKLNRSEGASHYFLDPDGHKLELHVAVSPSVWPPAANSRIRGWCFLLISEAA  
>GCA\_001621665

MLNALNHLTLAVSNLPASITFWRDLLGLRLHAEWHTGAYLTCGDLWLCLSYDETRTFIPPQNSDYTHYAFSVE  
PEHFDVAQKLDAGVTWKENKSEGASFYFLDPDGHKLELHVGDLAARLAACREKPYAGMVFTSDEA  
>GCA\_000633515

MLTGMNHLTLAVADVDRSLHFYRDILEMTLHARWKYGAYLTCGELWICLSADPEIIHRPVHQGYTHYAFTLPP  
EQFPAPFRSLLAAHQITLWKRNRSEGNVYFLDPDGHQLEVHSGGIQQRLDACREAPYEEMIFPDNTGE  
>GCA\_000950365

MLTGMNHLTLAVADVDRSLHFYRDILEMTLHARWKYGAYLTCGELWICLSADPEIIHRPVHQGYTHYAFTLPP  
EQFPAPFRSLLATHQITLWKRNRSEGNVYFLDPDGHQLEVHSGGIQQRLDACREAPYEEMIFPDNTGE  
>GCA\_001879425

MLSGLNHLTLAVSQAAPSVAFYQQLLGMTLHARWDSGAYLSCGDLWLCLSLDPQRRVTPPEESDYTHYAFSIS  
EADFASFAARLEAAGVAIWKLNRSEGASHYFLDPDGHKLELHVAVSPSVWPPAANSRIRGWCFLLISE  
>GCA\_001006635

MLHALNHLTLAVSHLPTSIAFWRDLLGLRLHAEWDTGAYLTCGDLWLCLSYDDARQYVPPQNSDYTHYAFSVA  
PEHFDTLVQILTAANVTWVDNKSEGASFYFLDPDGHKLELHVGDLAARLAACREKPYAGMVFTADD  
>GCA\_900085185

MLSGLNHLTLAVSQAAPSVAFYQQLLGMTLHARWDSGAYLSCGDLWLCLSLDPQRRITPPEESDYTHYAFSIS  
EADFASFAARLEVAGVAVWKLNRSEGASHYFLDSDGHKLELHVGSQAQRLAACREQPYKGMVFFDQ  
>GCA\_000692995

MLSGLNHLTLAVSQAAPSVAFYQQLLGMTLHARWDSGAYLSCGDLWLCLSLDPQRRITPSEESDYTHYAFSIS  
EADFASFAARLEVAGVAVWKLNRSEGASHYFLDPDGHKLELHVGSQAQRLAACREQPYKGMVFFDQ  
>GCA\_000566845

MLSGLNHLTLAVSQAAPSVAFYQQLGMMLHARWDSGAYLSCGDLWLCLLDPQRRVTPPEESDYTHYAFSISE  
ADFASFAARLEAAGVAVWKLNRSEGASHYFLDPDGHKLELHVGSQAQRLAACREQPYKGMVFFDE  
>GCA\_001970155

MLSGLNHLTLAVSQAAPSVAFYQQLLGMTLHARWDSGAYLSCGDLWLCLSLDPQRRVTPPEESDYTHYAFSIS  
EADFASFAARLEAAGVAIWKLNRSEGASHYFLDPDGHKLELHVGSQAQRLAACREQPYKGMVFFEE  
>GCA\_001033665

MLSGLNHLTLAVSQLAPSVAFYQQLGMTLHARWESGAYLSCGDLWLCLSLDPQRRITPPEESDYTHYAFSIS  
EADFACFAARLEVAGVAVWKLNRSEGASHYFLDPDGHKLELHVGSQAQRLAACREQPYKGMVFFDQ  
>GCA\_001033805  
MLSGLNHLTLAVSQLAPSVAFYQQLGMTLHARWESGAYLSCGDLWLCLSLDPQRRITPPEESDYTHYAFSIS  
EADFACFAARLEVAGVAVWKLNRSEGASHYFLDPDGHKLELHVGNLAQRLAACREQPYKGMVFFDQ  
>GCA\_001062535  
MLSGLNHLTLAVSQLAPSVAFYQQLGMTLHARWDSGAYLSCGDLWLCLSLDPQRRVTPPEESDYTHYAFSIS  
EADFASFAARLEAAGVAVWKLNRSEGASHYFLGPGGHKLELHVGSQAQRLAACREQPYKGMVFFDQ  
>GCA\_001936035  
MLSGLNHLTLAVSQLAPSVAFYQQLGMTLHARWDSGAYLSCGDLWLCLSLDPQRRVTPPEESDYTHYAFSIS  
EADFASFAARLEAAGVAVWKLNRSEGASHYFLDPDGHKLELHVGSQAQRLAACREQPYKGMVFFDE  
>GCA\_000805735  
MLSGLNHLTLAVSQLAPSVAFYQQLGMTLHARWDSGAYLSCGDLWLCLSLDPQRRVTPPEESDYTHYAFSIS  
EADFASFAARLEAAGVAIWKLNRSEGASHYFLDPDGHKLELHVGSQAQRLAACREQPYKGMVFFDQ  
>GCA\_900093305  
MLSGLNHLTLAVSQLAPSVAFYQQLGMTLHARWESGAYLSCGDLWLCLSLDPQRRITPPEESDYTHYAFSIS  
EADFACFTARLEVVGAVWKLNRSEGASHYFLDPDGHKLELHVGSQAQRLAACREQPYKGMVFFDQ  
>GCA\_000383335  
MLSGLNHLTLAVSQLAPSVAFYRRLGMTLHARWDSGAYLSCGDLWLCLSLDPQRRVTPPEESDYTHYAFSIS  
EADFASFAARLEVAGVAVWKLNRSEGESHYFLDPDGHKLELHVGSQAQRLAACREQPYKGMVFFEE  
>GCA\_900093015  
MLSGLNHLTLAVSQLAPSVAFYQQLGMTLHARWDSGAYLSCGDLWLCLSLDPQRRVTPPEESDYTHYAFSIS  
EADFASFAARLEAAGAAIWKLNRSEGASHYFLDPDGHKLELHVGSQAQRLAACREQPYKGMVFFDQ  
>GCA\_001011295  
MLSGLNHLTLAVSQLAPSVAFYHQLLGMTHARWDSGAYLSCGDLWLCLSLDPQRRVTPPEESDYTHYAFSIS  
EADFASFAARLEVAGVAVWKLNRSEGESHYFLDPDGHKLELHVGNLAQRLAACREQPYKGMVFFGE  
>GCA\_900085435  
MLSGLNHLTLAVSQLAPSVAFYQQLGMTLHARWESGAYLSCGDLWLCLSLDPQRRITPPEESDYTHYAFSIS  
EADFACFAARLEVAGVAVWKLNRSEGASHYFLDPDGHKLELHVGSQAQRLAACREQPYKGMVFFDQ  
>GCA\_001011385  
MLSGLNHLTLAVSQLAPSVAFYHQLLGMTHARWDSGAYLSCGDLWLCLSLDPQRRVTPPEESDYTHYAFSIS  
EADFASFAARLEVAGVALWKLNRSEGESHYFLDPDGHKLELHVGNLAQRLAACREQPYKGMVFFGE  
>GCA\_000754345  
MLIGINHLTLAVSDIQKISIFYQTVLGMQLHASWERGAYLTCGALWVCLSYDPMRQEVAAAKRRDYTHYAFTV  
SAEDFSDIVEKHLHQAGVTWVKDNRSEGDSFYFLDPDGHQLEIHVGSLLIDRLKSCRKKPYDGMVFFS  
>GCA\_900084795  
MLSGLNHLTLAVSQLAPSVAFYQQLGMTLHARWDSGAYLSCGDLWLCLSLDPQRRITPPEESDYTHYAFSIS  
EADFASFAARLEVAGVAVWKLNRSEGASHYFLDPDGHKLELHVGSQAQRLAACREQPYKGMVFFDQ  
>GCA\_000822705  
MLSGLNHLTLAVSQLAPSVAFYQQLGMTLHARWDSGAYLSCGDLWLCLSLDPQRRVTPPEESDYTHYAFSIS  
EADFASFAARLEAAGVAVWKLNRSEGASHYFLDPDGHKLELHVGSQAQRLAACREQPYKGMVFFAE  
>GCA\_001914065  
MLSGLNHLTLAVSQLAPSVAFYQQLGMTLHARWDRGAYLSCGDLWLCLSLDPQRRVTPPEESDYTHYAFSIS  
EADFASFAARLEAAGVAIWKLNRSEGASHYFLDPDGHKLELHVGSQAQRLAACREQPYKGMVFFDQ  
>GCA\_000220485  
MLSGLNHLTLAVSQLAPSVAFYQQLGMTLHARWDSGAYLSCGDLWLCLSLDPQRRVTPPEESDYTHYAFSIS  
EADFASFAARLEAAGVAIWKLNRSEGASHYFLDPDGHKLELHVGSQAQRLAACREQPYKGMVFFEQ  
>GCA\_000334515  
MLSGLNHLTLAVSQLAPSVAFYHQLLGMTHARWDSGAYLSCGDLWLCLSLDPQRRVTPPEESDYTHYAFSIS  
EADFTSFAARLEVAGVAVWKLNRSEGESHYFLDPDGHKLELHVGNLAQRLAACREQPYKGMVFFGE  
>GCA\_000957705  
MLSGLNHLTLAVSQLAPSVAFYHQLLGMTHARWDSGAYLSCGDLWLCLSLDPQRRVTPPEESDYTHYAFSIS  
EADFAGFAARLEVAGVAVWKLNRSEGESHYFLDPDGHKLELHVGSQAQRLAACREQPYKGMVFFGE  
>GCA\_001631345



MLSGLNHLTLAVSQLAPSVAFYHQLLGMTLHARWDSGAYLSCGDLWLCLSLDPQRRVTPPEESDYTHYAFSIS  
EADFASFAARLEVAGVAVWKLNRSEGESHYFLDPDGHKLELHVSNLAQRLAACREQPYKGMVFFEE  
>GCA\_000822225

MLSGLNHLTLAVSQLAPSVAFYQQLLGMTLHARWDCGAYLSCGDLWLCLSLDPQRRVTPPEESDYTHYAFSIS  
EADFASFAARLEVAGVAVWKLNRSEGASHYFLDPDGHKLELHVGS LAQRLAACREQPYKGMVFFAE  
>GCA\_000936205

MLSGLNHLTLAVSQLAPSVAFYQQLLGMTLHARWDSGAYLSCGDLWLCLSLDPQRRITPPEESDYTHYAFSIS  
EADFASFAARLEVAGVAVWKLNRSEGASHYFLDPDGHKLELHVGS LDLRLAACREQPYKGMVFFDQ  
>GCA\_001530015

MLSGLNHLTLAVSQLAPSVAFYQQLLGMTLHARWDSGAYLSCGDLWLCLSPDPQRRVTPPEESDYTHYAFSIS  
EADFASFAARLEAAGVAIWKLNRSEGASHYFLDPDGHKLELHVGS LAQRLAACREQPYKGMVFFDQ  
>GCA\_001071835

MLSGLNHLTLAVSQLAPSVAFYHQLLGMTLHARWDSGAYLSCGDLWLCLSLDPQRRVTPPEESDYTHYAFSIS  
EADFASFAARLEAAGVAVWKLNRSEGESHYFLDPDGHKLELHVGS LAQRLAACREQPYKGMVFFDE  
>GCA\_001463185

MLSGLNHLTLAVSQLAPSVAFYQQLLGMTLHARWDSGAYLSCGDLWLCLSLDPQRRITPPEESDYTHYAFSIS  
EADFACFAARLEVAGVAVWKLNRSEGASHYFLDPDGHKLELHVGNLAQRLAACREQPYKGMVFFDQ  
>GCA\_000412575

MLSGLNHLTLAVSQLAPSVAFYQQLLGMTLHARWDSGAYLSCGDLWLCLSLDPQRRITPPEESDYTHYAFSIS  
EADFASFAARLEAAGVAIWKLNRSEGASHYFLDPDGHKLELHVGS LAQRLAACREQPYKGMVFFDQ  
>GCA\_001011515

MLSGLNHLTLAVSQLAPSVAFYHQLLGMTLHARWDSGAYLSCGDLWLCLSLDPQRRVTPPEESDYTHYAFSIS  
EADFASFAARLEVAGVAVWKLNRSEGESHYFLDPDGHKLELHVGS LAQRLAACREQPYKGMVFFDE  
>GCA\_000692155

MLSGLNHLTLAVSQLAPSVAFYHQLLGMTLHARWDSGAYLSCGDLWLCLSLDPQRRVTPPEESDYTHYAFSIS  
EADFASFAARLEVAGVAVWKLNRSEGESHYFLDPDGHKLELHVGNLAQRLAACREQPYKGMVFFDE  
>GCA\_000827665

MLSGLNHLTLAVSQLAPSVAFYQQLLGMTLHARWDSGAYLSCGDLWLCLSLDPQRRVTPPEESDYTHYAFSIS  
EADFARFAARLEVGVAVWKLNRSEGASHYFLDPDGHKLELHVGS LAQRLAACREQPYKGMVFFDE  
>GCA\_001011595

MLSGLNHLTLAVSQLAPSVAFYHQLLGMTLHARWDSGAYLSCGDLWLCLSLDPQRRVTPPEESDYTHYAFSIS  
EADFASFAARLEVAGVAVWKLNRSEGESHYFLDPDGHKLELHVGS LAKRLAACREQPYKGMVFFGE  
>GCA\_000492835

MLSGLNHLTLAVSQLAPSVAFYQQLLGMTLHARWDSGAYLSCGDLWLCLSLDPQRRITPPEESDYTHYAFSIS  
EADFARFAARLEVAGVAVWKLNRSEGASHYFLDPDGHKLELHVGS LAQRLAACREQPYKGMVFFDE  
>GCA\_001066095

MLSGLNHLTLAVSQLAPSVAFYQQLLGMTLHARWDSGAYLSCGDLWLCLSLDPQRRITPPEESDYTHYAFSIS  
EADFASFAARLEAAGVAIWKLNRSEGASHYFLDPDGHKLELHVGS LAQRLAACREQPYKGMVFFDE  
>GCA\_900085315

MLSGLNHLTLAVSQLAPSVAFYQQLLGMTLHARWDSGAYLSCGDLWLCLSLDPQRRVTPPEESDYTHYAFSIS  
EADFASFAARLEAAGVAVWKLNRSEGASHYFLDPDGHKLELHVGS LAQRLAACREQPYKGMVFFAE  
>GCA\_001631815

MLSGLNHLTLAVSQLAPSVAFYHQLLGITLHARWDSGAYLSCGDLWLCLSLDPQRRVTPPEESDYTHYAFSIS  
EADFASFTARLEVAGVAVWKLNRSEGESHYFLDPDGHKLELHVGS LAQRLAACREQPYKGMVFFGE  
>GCA\_001011795

MLSGLNHLTLAVGQLAPSVAFYHQLLGMTLHARWDSGAYLSCGDLWLCLSLDPQRRVTPPEESDYTHYAFSIS  
EADFASFAARLESAGVAVWKLNRSEGESYYFLDPDGHKLELHVGS LAQRLAACREQPYKGMVFFDE  
>GCA\_001011355

MLSGLNHLTLAVSQLAPSAAFYHQLLGMTLHARWDSGAYLSCGDLWLCLSLDPQRRVTPPEESDYTHYAFSIS  
EADFASFAARLEVAGVAVWKLNRSEGESHYFLDPDGHKLELHVGNLAQRLAACREQPYKGMVFFDE  
>GCA\_001034045

MLSGLNHLTLAVSQLAPSVAFYQQLLGMTLHARWDSGAYLSCGDLWLCLSLDPQRRITPPEESDYTHYAFSIS  
EADFASFAARLEVAGVAVWKLNRSEGASHYFLDPDGHKLELHVGS LAQRLAACREQPYKGMVFFDE  
>GCA\_001597035

MLSGLNHLTLAVSQLAPSVAFYQQLLGMTLHARWDSGAYLSCGDLWLCLSLDPQRRVTPPEESDYTHYAFSIS  
EADFARFAARLEAAGVAIWKLNLRSEGASHYFLDPDGHKLELHVGSQAQRLAACREQPYKGMVFFAE  
>GCA\_900084815  
MLSGLNHLTLAVSQLAPSVAFYQQLLGMTLHARWDSGAYLSCGDLWLCLSLDPQRRITPSEESDYTHYAFSIS  
EADFASFAARLEVSGVAVWKLNLRSEGASHYFLDPDGHKLELHVGSQAQRLAACREQPYKGMVFFDQ  
>GCA\_001720645  
MLSGLNHLTLAVSQLAPSVAFYQQLLGMTLHARWDSGAYLSCGDLWLCLSLDPQRRVTPPEESDYPHYAFSIS  
EADFASSAARLEAAGVAIWKLNLRSEGASHYFLDPDGHKLELHVGSQAQRLAACREQPYKGMVFFDQ  
>GCA\_000019565  
MLSGLNHLTLAVSQLAPSVAFYQQLLGMTLHARWDSGAYLSCGDLWLCLSLDPQRRITPPEESDYTHYAFSIS  
EADFASFAARLEVAGVAVWKLNLRSEGASHYFLDPDGHKLELHVGSQAQRLAACREQPYKGMVFFDQ  
>GCA\_001006555  
MLSGLNHLTLAVSQLAPSVAFYHQLLGMTLHARWDSGAYLSCGDLWLCLSLDPQRRVTPPEESDYTHYAFSIS  
EADFASFAARLEVAGVAVWKLNLRSEGESHYFLDPDGHKLELHVGNLAQRLAACREQPYKGMVFFGD  
>GCA\_000723925  
MLSGLNHLTLAVSQLAPSVAFYQQLLGMTLHARWDSGAYLSCGDLWLCLSLDPQRRVTPPEESNYTHYAFSIS  
EADFASFAARLEAAGVAVWKLNLRSEGASHYFLDPDGHKLELHVGSQAQRLAACREQPYKGMVFFDE  
>GCA\_001312905  
MLSGLNHLTLAVSSLAPSVAFYLQLLGMTLHARWDGGAYLSCGDLWLCLSLDPQRRVTPPEESDYTHYAFSVA  
EADFAGFSARLETAGVAVWKNRNRSEGASYFLDPDGHKLELHVGSQAQRLAACREQPYKGMVFFYDE  
>GCA\_900083685  
MLSGLNHLTLAVSSLAPSVAFYHQLLGMTLHARWDGGAYLSCGDLWLCLSLDPQRRITPPEESDYTHYAFSVA  
EADFAGFSARLETAGVAVWKNRNRSEGASYFLDPDGHKLELHVGSQAQRLAACREQPYKGMVFFYDE  
>GCA\_000534135  
MLSGLNHLTLAVSQLAPSVAFYHQLLGMTLHARWDSGAYLSCGDLWLCLSLDPQRRVTPPEESDYTHYAFSIS  
EADFASFAARLEVAGVAVWKLNLRSEGESHYFLDPDGHKLELHVGNLPQRLAACREQPYKGMVFFGE  
>GCA\_000263095  
MLSGLNHLTLAVSQLAPSVAFYQQLLGMTLHARWDSGAYLSCGDLWLCLSLDPQRRVTPPEESDYTHYAFSIS  
EADFASFAARLEAAGVAIWKLNLRSEGASHYFLDPDGHKLELHVGSQAQRLAACREQPYKGMVFFDE  
>GCA\_001011915  
MLSGLNHLTLAVSQLAPSVAFYHQLLGMTLHARWDSGAYLSCGDLWLCLSLDPQRRVTPPEESDYTHYAFSIS  
EADFASFAARLEVAGVAVWKLNLRSEGESHYFLDPDGHKLELHVGNLAQRLAACREQPYKGMVFFEE  
>GCA\_000255975  
MLSGLNHLTLAVSQLAPSVAFYQQLLGMTLHARWDSGAYLSCGDLWLCLSLDPQRRVTPPEESDYTHYAFSIS  
EADFASFAARLEVAGVAVWKLNLRSEGASHYFLDPDGHKLELHVGSQAQRLAACREQPYKGMVFFDQ  
>GCA\_000783515  
MLSGLNHLTLAVSQLAPSVAFYQQLLGMTLHARWDSGAYLSCGDLWLCLSLDPQRRITPPEESDYTHYAFSIS  
EADFASFAARLEAAGVAIWKLNLRSEGASHYFLDPDGHKLELHVGSQAQRLAACREQPYKGMVFFEQ  
>GCA\_000492215  
MLSGLNHLTLAVSQLAPSVAFYQQLLGMMLHARWDSGAYLSCGDLWLCLSLDPQRRVTPPEESDYTHYAFSIS  
EADFASFAARLEAAGVAVWKLNLRSEGASHYFLDPDGHKLELHVGSQAQRLAACREQPYKGMVFFDE  
>GCA\_001031245  
MLSGLNHLTLAVSQLAPSVAFYQQLLGMTLHARWDSGAYLSCGDLWLCLSLDPQRRVTPPEESDYTHYAFSIS  
EADFASFAARLEVAGVAVWKLNLRSEGASHYFLDPDGHKLELHVGSQAQRLAACREQPYKGMVFFAE  
>GCA\_000492475  
MLSGLNHLTLAVSQLAPSVAFYQQLLGMTLHARWDSGAYLSCGDLWLCLSLDPQRRITPSEESDYTHYAFSIS  
EADFASFAARLEVAGVAVWKLNLRSEGASHYFLDPDGHKLELHVGSQAQRLAACREQPYKGMVFFDE  
>GCA\_000474015  
MLSGLNHLTLAVSQLAPSVAFYQQLLGMTLHARWDSGAYLSCGDLWLCLSLDPQRRVTPPEESDYTHYAFSIS  
EADFASFAARLEAAGVAIWKLNLRSEGASHYFHPDGHKLELHVGSQAQRLAACREQPYKGMVFFAE  
>GCA\_001888205  
MLIGINHLTLAVSDIQKISFYQTVLGMQLHASWERGAYLTCGALWVCLSYDPMRQEVAAAKCRDYTHYAFTV  
SAEDFSDIVEKLNQAGVTVWKNRNRSEGDSFYFLDPDGHQLEIHVGSQIDRLKSCRKKPYDGMVFYS  
>GCA\_001006575

MLSGLNHLTLAVS QLAPSVAFYQHLLGMTLHARWDSGAYLSCGDLWLCLSLDPQRRITPPEESDYTHYAFSIS  
EADFASFAARLEVAGVAVWKLNRSEGASHYFLDPDGHKLELHVGS LDQRLAACREQPYKGMVFFDQ  
>GCA\_000409715

MLSGLNHLTLAVS QLAPSVAFYQQLLGMTLHARWDSGAYLSCGDLWLCLSLDPQRRVTPPEESDYTHYAFSIS  
EADFASFAARLEAAGVAIWKLNRSEGASHYFLDPDGHKLELHVGS LAQRLAACREQPYKGMVFFDQ  
>GCA\_000755545

MLSGLNHLTLAVS QLAPSVAFYRRLGMTLHARWDSGAYLSCGDLWLCLSLDPQRRVTPPEESDYTHYAFSIS  
EADFASFAARLEVAGVAVWKLNRSEGESHYFLDPDGHKLELHVGNLAQRLAACREQPYKGMVFFEE  
>GCA\_000367165

MLSGLNHLTLAVS QLAPSVAFYQQLLGMTLHARWDSGAYLSCGDLWLCLSLDPQRRVTPPEESDYTHYAFSIS  
EADFARFAARLEVAGVAVWKLNRSEGASHYFLDPDGHKLELHVGS LAQRLAACREQPYKGMVFFDQ  
>GCA\_000694735

MLSGLNHLTLAVS QLAPSVAFYQQLLGMTLHARWDSGAYLSCGDLWLCLSLDPQRRITPPEESDYTHYAFSIS  
EADFASFAARLEVAGVAVWKLNRSEGASHYFLDPDGHKLELHVGS LDQRLAACREQPYKGMVFFDQ  
>GCA\_001666015

MLSGLNHLTLAVS QLAPSVAFYQQLLGMTLHARWDSGAYLSCGDLWLCLSLDPQRRVTPPEESDYTHYAFSIS  
EADFASFAARLGAAGVAVWKLNRSEGASHYFLDPDGHKLELHVGS LAQRLAACREQPYKGMVFFEE  
>GCA\_900084115

MLSGLNHLTLAVS QLAPSVAFYQQLLGMTLHARWDSGAYLSCGDLWLCLSLDPQRRVTPPEESDYIHYAFSIS  
EADFASFAARLEAAGVAIWKLNRSEGASHYFLDPDGHKLELHVGS LAQRLAACREQPYKGMVFFDE  
>GCA\_001033975

MLSGLNHLTLAVS QLAPSVAFYQQLLGMTLHARWDSGYLSCGDLWLCLSLDPQRRVTPPEESDYTHYAFSIS  
EADFASFAARLEAAGVAIWKLNRSEGASHYFLDPDGHKLELHVGS LAQRLAACREQPYKGMVFFDQ  
>GCA\_000821545

MLSGLNHLTLAVS QLAPGVAFYQQLLGMTLHARWDSGAYLSCGDLWLCLSLDPQRRVTPPEESDYTHYAFSIS  
EADFASFAARLEVAGVAVWKLNRSEGASHYFLDPDGHKLELHVGS LAQRLAACREQPYKGMVFFDQ  
>GCA\_000956775

MLSGLNHLTLAVS QLAPSVAFYHQLLGMTLHARWDSGAYLSCGDLWLCLSLDPQRRVTPPEESDYTHYAFSIS  
EADFAGFAARLEVAGVAVWKLNRSEGESHYFLDPDGHKLELHVGS LAQRLAACREQPYKGMVFFGE  
>GCA\_001280925

MLSGLNHLTLAVS QLAPSVAFYQQLLGMTLHARWDSGAYLSCGDLWLCLSLDPQRRVTPPEESDYTHYAFSIS  
EADFARFAARLEVAGVAVWKLNRSEGASHYFLDPDGHKLELHVGS LVQRLAACREQPYKGMVFFDQ  
>GCA\_000219945

MLSGLNHLTLAVS QLAPSVAFYQQLLGMTLHARWDSGAYLSCGDLWLCLSLDPQRRVTPPEESDYTHYAFSIS  
EADFASFAARLEAAGVAVWKLNRSEGASHYFLDPDGHKLELHVGS LAQRLAACREQPYKGMVFFDQ  
>GCA\_000498775

MLSGLNHLTLAVS QLAPSVAFYQQQLGMTLHARWDSGAYLSCGDLWLCLSLDPQRRVTPPEESDYTHYAFSIS  
EADFASFAARLEAAGVAIWKLNRSEGASHYFLDPDGHKLELHVGS LAQRLAACREQPYKGMVFFDQ  
>GCA\_001030055

MLSGLNHLTLAVS QLAPSVAFYHQLIGMTLHARWDSGAYLSCGDLWLCLSLDPQRRVTPPEESDYTHYAFSIS  
EADFASFAARLEVAGVAVWKLNRSEGESHYFLDPDGHKLELHVGNLAQRLAACREQPYKGMVFFGE  
>GCA\_000493115

MLSGLNHLTLAVS QLAPSVAFYQQLLGMTLHARWDSGAYLSCGDLWLCLSLDPQRRVTPPEESDYTHYAFSIS  
EVDFAFASFAARLEVAGVAVWKLNRSEGASHYFLDPDGHKLELHVGS LAQRLAACREQPYKGMVFFDQ  
>GCA\_000693815

MLSGLNHLTLAVS QLAPSVAFYQQLLGMTLHARWDSGAYLSCGDLWLCLSLDTQRRVTPPEESDYTHYAFSIS  
EADFASFAARLEAAGVAIWKLNRSEGASHYFLDPDGHKLELHVGS LAQRLAACREQPYKGMVFFEE  
>GCA\_001974865

MLSGLNHLTLAVS QLAPSVAFYHQLLGMTLHARWDSGAYLSCGDLWLCLSLDPQRRVTPPEESDYTHYAFSIS  
EADFAGFAARLEVAGVAVWKLNRSEGESHYFLDPDGHKLELHVGNLAQRLAACREQPYKGMVFFGE  
>GCA\_001373075

MLSGLNHLTLAVS QLAPSVAFYQQLLGMTLHARWDSGAYLSCGDLWLCLSLDPQRRVTPPEESDYTHYAFSIS  
EADFASFAARLEVAGVAVWKLNRSEGASHYFLDPDGHKLELHVGS LAQRLAACREQPYKGMVFFDE  
>GCA\_000822485

MLSGLNHLTLAVSQLAPSVAFYQQQLGMTLHARWDSGAYLSCGDLWLCLSLDPQRRVTPPEESDYTHYAFSIS  
EADFASFAARLEAAGVAVWKLNRSEGASHYFLDPDGHKLELHVGSQAQRLAACREQPYKGMVFFDQ  
>GCA\_001968995  
MLIGINHLTLAVSDIQKSI SFYQTVLGMQLHASWERGAYLTCGALWVCLSYDPMRQEVAAAKRRDYTHYAFTV  
SAEDFSDIVEKLBHAGVTVWKNRSEGD SFYFLDPDGHQLEI HVGLLIDRLKSCRKKPYDGMVFYS  
>GCA\_000714635  
MLSGLNHLTLAVSQLAPSVAFYQQQLGMTLHARWDSGAYLSCGDLWLCLSLDPQRRITPSEESDYTHYAFSIS  
EADFASFAARLEVAGVAVWKLNRSEGASHYFLDPDGHKLELHVGSQAQRLAACREQPYKGMVFFDQ  
>GCA\_001404095  
MLSGLNHLTLAVSQLAPSVAFYQQQLGMTLHARWDSGAYLSCGDLWLCLSLDPQRRVTPPEESDYTHYAFSIS  
EADFASFAARLEAAGVAIWKLNRSEGASHYFLDPDGHKLELHVGSLSQRLAACREQPYKGMVFFDE  
>GCA\_900084085  
MLSGLNHLTLAVSQLAPSVAFYQQQLGMTLHARWDSGAYLSCGDLWLCLSLDPQRRITPPEESDYTHYAFSIS  
EADFASFAARLEVAGVAVWKLNRSEGASHYFLDPDGHKLELHVGSQAQRLAACREQPYKGMVFFAE  
>GCA\_900092875  
MLSGLNHLTLAVSQLAPSVAFYQQQLGMMLHARWDSGAYLSCGDLWLCLSLDPQRRVTPPEESDYTHYAFSIS  
EADFASFAARLEAAGVAVWKLNRSEGASHYFLDPDGHKLELHVGSQAQRLAACREQPYKGMVFFDQ  
>GCA\_000692955  
MLSGLNHLTLAVSQLAPSVAFYQQQLGMTLHARWDSGAYLSCGDLWLCLSLDPQRRVTPPEESDYTHYAFSIS  
EADFASFAARLEAAGVAIWKLNRSEGASHYFLDPDGHKLELHVGSQAQRLAACREQPYKGI VFFDE  
>GCA\_000349245  
LSGLNHLTLAVSQLAPSVAFYQQQLGMTLHARWDSGAYLSCGDLWLCLSLDPQRRVTPPEESDYTHYAFSISE  
ADFARFAARLEVADVAVWKLNRSEGASHYFLDPDGHKLELHVGSQAQRLAACREQPYKGMVFFDE  
>GCA\_900119335  
MLSGLNHLTLAVSQLAPSVAFYRRLGMTLHARWDSGAYLSCGDLWLCLSLDPQRRVTPPEESDYTHYAFSIS  
EADFASFAARLEVAGVAVWKLNRSEGESHYFLDPDGHKLELHVGSQAQRLAACREQPYKGMVFIE  
>GCA\_001894545  
MLQGLNHLTLAVSDLASSLAFYQQLPGMRLHASWDSGAYLSCGALWLCLSLDEQRRKTPPQESDYTHYAFSVA  
EEEFAGVVALLAQAGAEVWKNRSEGASYYFLDPDGHKLELHVGNLAQRLAACRERPYKGMVFFD  
>GCA\_001549975  
LSGLNHLTLAVSQLAPSVAFYQQQLGMTLHARWDSGAYLSCGDLWLCLSLDPQRRITPLEESDYTHYAFSISE  
ADFASFAARLEVAGVAVWKLNRSEGASHYVLDPDGHKLELHVGSQAQRLAACREQPYKGMVFFDQ  
>GCA\_900093395  
MLSGLNHLTLAVSQLAPSVAFYQQQLGMTLHARWESGAYLSCGDLWLCLSLDPQRRITPPEESDYTHYAFSIS  
EADFACFAARLEVAGVAVWKLNRSEGASHYFLD TDGHKLELHVGSQAQRLAACREQPYKGMVFFD  
>GCA\_900086385  
LSGLNHLTLAVSQLAPSVAFYQQQLGMTLHARWDSGAYLSCGDLWLCLSLDPQRRITPSEESDYTHYAFSISE  
ADFASFAARLEVAGVAVWKLNRSEGASHYFLDL DGHKLELHVGS LDQRLAACREQPYKGMVFFDQ  
>GCA\_000986855  
LSGLNHLTLAVSQLAPSVAFYQQQLGMTLHARWDSGAYLSCGDLWLCLSLDPQRRITPSEESDYTHYAFSISE  
ADFASFAARLEVAGVAVWKLNRSEGASHYFLDL DGHKLELHVGS QAQRLAACREQPYKGMVFFDQ  
>GCA\_000492415  
MLSGLNHLTLAVSQLAPSVAFYQQQLGMTLHARWESGAYLSCGDLWLCLSLDPQRRITPPEESDYTHYAFSIS  
EADFACFAARLEVAGVAVWKLNRSEGASHYFLDPDGHKLELHVGNLAQRLAACREQPYRGMVFFD  
>GCA\_001006625  
LSGLNHLTLAVSQLAPSVAFYQQQLGMTLHARWDSGAYLSCGDLWLCLSLDPQRRITPSEESDYTHYAFSISE  
ADFASFAARLEVAGVAVWKLNRSEGASHYFLDPDGHKLELHVGS LDQRLAACREQPYKGMVFFDQ  
>GCA\_001548315  
LSGLNHLTLAVSQLAPSVAFYQQQLGMTLHARWDSGAYLSCGDLWLCLSLDPQRRVTPPEESDYTHYAFSISE  
ADFARFVARLEVAGVAVWKLNRSEGASHYFLDPDGHKLELHVGSQAQRLAACREQPYKGMVFFDE  
>GCA\_000804345  
MLQGLNHLTLAVSDLASSLAFYQRLPGMRLHARWDSGAYLSCGALWLCLSLDAQRRKTPAQESDYTHYAFSVA  
EEHFAEVVAQLAHAGA EVWKNRSEGASYYFLDPDGHKLELHVGH LAQRLAACRERPYKGMVFFD  
>GCA\_900084895

LSGLNHLTLAVS QLAPSVAFYQQLLGMTLHARWDSGAYLSCGDLWLCLSLDPQRRVTPPEKSDYTHYAFSISE  
ADFARFAARLEVAGVAVWKLNRSEGASHYFLDPDGHKLELHVGS LAQRLAACREQPYKGMVFFDQ  
>GCA\_000496775  
MLSTLNHLTLAVSDLARSVDYFHQLLGLKLHARWDNGAYLTCGDIWICLSVDEARRVTPAEQSDYTHYAFSIG  
EGELAAFITRLEQAGVVSWKVNKSEGASYFLDPDGHKLEAHVGD LAQRLAACRAKPYKGMVFF  
>GCA\_001059375  
LKSINHCFSVRNLNDSIHFYRDILLGKLLFTGKKTAYFELAGLWIALNEEKDIPRNEIHFSYTHIAFTIDDS  
EFKYWHQRLKDNVNIILEGRVDIRDRQSIYFTDPDGHKLELHTGTLEDRLNYYKEAKPHMTFY  
>GCA\_000956895  
MLSGLNHLTLAVS QLAPSVAFYHQLLGMTLHARWDSGAYLSCGDLWLCLSLDPQRRVTPPEESDYTHYAFSIS  
EADFASFAARLEAAGVAVWKLNRSEGESHYFLDPDGHKLELHVGS LAQRLAACREQPYKGMVFF  
>GCA\_001631605  
MLSGLNHLTLAVS QLAPSVAFYHQLLGMTLHARWDSGAYLSCGDLWLCLSLDPQRRVTPPEESDYTHYAFSIS  
EADFASFAARLEVAGVAVWKLNRSEGESHYFLDPDGHKLELHVGS LAQRLAACREQPYKGMVFF  
>GCA\_000297835  
MLTDLNHLTLAVNDVKKS FHFYVEVLGFKPLALWDHGAYLQNLTLWLCLSEDTRNITEISDYTHYAFSLSANN  
FETFKQHLLSHGITSWKENKSEGDSFYFYDPDNHKL EIHVGDLESRLKTCRQYPYSGMQFFDNK  
>GCA\_001853385  
MLLGINHLTIAVTNVEKSIYFYHHILGMHLHASWKNNGAYLTCGELWVCLSFDPQRHHVDPDTTDYTHYAFSVT  
ENDFSLVVEK LQQFDVKVWKDNRSEGASFYFLDPDGHKLEI HVGSLLDRLKSCLVHPYEEMKFY  
>GCA\_000158055  
MLNGINHLTLAVTDLEKSI GFYQSLGMLKHLASWKKGAYISCGDLWLCLSLDITRQFSSPEKTDYTHYAFNVD  
AKDFLIVVDRLMQANVIVWKENKSEGDSFYFLDPDGHKLELHVGS LLQRLKSCQEKPYEEMKFY  
>GCA\_001076695  
MLTDLNHLTLAVNDVKKS FHFYVEVLGFKPLALWDHGAYLQNLTLWLCLSKDTRNITEISDYTHYAFSLSANN  
FETFKQHLLSHGITSWKENKSEGDSFYFYDPDNHKL EIHVGDLESRLKTCRQYPYSGMQFFDNK  
>GCA\_000314835  
MLNGINHLTLAVTDLDKSI SFYQSLGMLKLYASWKKGAYISCGDLWLCLSLDTTRQFLSPEKTDYTHYAFNVD  
AKDFLIVVDRLMQANVIVWKENKSEGDSFYFLDPDGHKLELHVGS LLQRLKSCQEKPYEEMKFY  
>GCA\_001680125  
MLNGINHLTLAVTDLDKSI SFYQSLGMLKHLASWKKGAYISCGDLWLCLSLDTTRQFLSPEKTDYTHYAFNVD  
AKDFLIVVDRLMQANVIVWKENKSEGDSFYFLDPDGHKLELHVGS LLQRLKSCQEKPYEEMKFY  
>GCA\_001011625  
MLSGLNHLTLAVS QLAPSVAFYHQLLGMTLHARWDSGAYLSCGDLWLCLSLDPQRRVTPPEESDYTHYAFSIS  
EADFASFAARLEVAGVAVWKLNRSEGESHYFLDPDGHKLELHVGS LAQRLAACREQPYKGMVFF  
>GCA\_000530175  
MLSGLNHLTLAVS QLAPSVAFYQQLLGMMLHARWDSGAYLSCGDLWLCLSLDPQRRVTPPEESDYTHYAFSIS  
EADFASFAARLEAAGVAVWKLNRSEGASHYFLDPDGHKLELHVGS LAQRLAACREQPYKGDGVF  
>GCA\_000805715  
MLVGINHLTIAVTDVEKSI FFYQSLGMLKHLASWKNNGAYISCGDLWLCLSLDKTRLSFSHTETDYTHYAFVTS  
EADFPICVAKLKQANVIVWKENKSEGKSFYFLDPDGHKLELHVGS LLQRLKSCQEAPYEGMKFY  
>GCA\_000020885  
MLQSLNHLTLAVSNLQTS LTFWRDLLGQLHAEWDTGAYLTCGDLWVCLSYDVSRNYVAPQESDYTHYAFSIA  
PEDFEPFSCKLKQAGVT VWKDNKSEGQSFYFLDPDGHKLELHVGD LASRLTQCREKPYSGMRF  
>GCA\_001474655  
MLQSLNHLTLAVSNLQTS LTFWRDLLGQLHAEWDTGAYLTCGDLWVCLSYDVSRNYVAPQESDHYTHYAFSIA  
PEDFEPFSCKLKQAGVT VWKDNKSEGQSFYFLDPDGHKLELHVGD LASRLTQCREKPYSGMRF  
>GCA\_000190795  
MLQSLNHLTLAVSNLQSS LTFWRDLLGQLHAEWGTGAYLTCGDLWVCLSYDVSRSYVAPQKSDYTHYAFSIA  
PEDFEPFSYK LKQSGVT VWKDNKSEGQSFYFLDPDGHKLELHVGD LASRLAQCRERPYSGMRF  
>GCA\_001474845  
MLQSLNHLTLAVSKLQTS LTFWRDLLGQLHAEWDTGAYLTCGDLWVCLSYDVSCNYVAPQECDYTHYAFSIA  
PEDFEPFSYK LKQAGVT VWKDNKSEGQSFYFLDPDGHKLELHVGD LASRLAQCREKPYSGMRF  
>GCA\_000020705

MLQSLNHLTLAVSNLQTSLTFWRDLLGLQLHAEWDTGAYLTCGDLWVCLSYDVSCNYVAPQECDYTHYAFSIA  
PEDFEPFSYKQAGVTWVKDNKSEGQSFYFLDPDGHKLELHVGD LASRLAQC REKPYSGMRF  
>GCA\_000487235  
MLQSLNHLTLAVSNLQTSLTFWRDLLGLQLHVEWDTGAYLTCGDLWVCLSYDVSRNYVAPQESDYTHYAFSIA  
PEDFEPFSYKQAGVTWVKDNKSEGQSFYFLDPDGHKLELHVGD LASRLTQCRERPYSGMRF  
>GCA\_001903595  
MLSGLNHLTLAVSRLAPSVAFYHQLLGMTLHARWDGGAYLACGDLWLCLSLDPQRRITPPEESDYTHYAFSIA  
EADFSGVAARLEVAGVTMWKMNRS EGASYYFLDPDGHKLELHVGS LAQR LAACREQPYKGMVF  
>GCA\_001309675  
VIQSLNHLTLAVSNLQSSLTFWRDLLGLQLHAEWGTGAYLTCGDLWLCLSYDVSRSYVAPQKSDYTHYAFSIA  
PEDFEPFSYKQSGVTWVKDNKSEGQSFYFLDPDGHKLELHVGD LASRLAQC REKPYSGMRF  
>GCA\_001880915  
MLQSLNHLTLAVSNLQTSLTFWRDLLGLQLHAEWETGAYLTCGDLWICLSYDVSRNYVAPQESDYTHYAFSIT  
PEDFESFSYKQSGVTWVKENKSEGQSFYFLDPDGHKLELHVGD LASRLAQC REKPYSGMRF  
>GCA\_001569625  
MLQSLNHLTLAVSNLQTSLTFWRDLLGLQLHAEWDTGAYLTCGDLWVCLSYDVSRNYVAPQESDYTHYAFSIA  
PEDFEPFSCKLQAGVTWVKDNKSEGQSFYFLDPDGHKLELHVGD LASRLTQCRERPYSGMRF  
>GCA\_001034065  
LSGLNHLTLAVSQLAPSVAFYQQLLGMTLHARWDSGAYLSCGDLWLCLSLDPQRRITPSEESDYTHYAFSISE  
ADFASFAARLEVAGVAVWKLNRSEGASHYFLDPDGHKLELHVGS LDQR LAACREQPYKGMVFL  
>GCA\_001537405  
MLQSLNHLTLAVSNLQSSLAFWRDLLGLQLHAEWDTGAYLTCGDLWICLSYDVSRNYVAPRES DNTHYAFSIA  
PEDFEPFSYKQSEVMVWKANKSEGQSFYFLDPDGHKLELHVGD LASRLAQCMAKPYSGMLF  
>GCA\_000486835  
MLQSLNHLTLAVSNLQTSLTFWRDLLGLQLHAEWDTGAYLTCGDLWVCLSYDVSRNYVAPQESDYTHYAFSIA  
PEDFEPFSCKLQAGVTWVKDNKSEGQSFYFLDPDGHKLELHVGD LASRLAQC REKPYSGMRF  
>GCA\_000529745  
ILQSLNHLMLAVSNLQSSLTFRDLLGLQLHAEWDTGAYLTCGDLWICLSYDVSRNYVATQEGDYTHYAFSIA P  
EDFESFSYKQAGVTWVKDNKSEGQSFYFLDPDGHKSELHVGD LASRLVQCRERLYSGMRF  
>GCA\_000791765  
MFTGLNHLTLAVADLPASIAFYRDLLGFRLEARWDQGAYLELGSLWLCLSLREPQYGGPVADYTHYAFGIAAAD  
FARFAAQLRAHGVREWKQNRSEGDSFYFLDPDGHRLEAHVGD LRSRLAACRQAPYAGMRFAD  
>GCA\_001902635  
MLTGLNHLTLAVSDLDRSDFYRHLLGFTPHARWQGGYLSLGALWLCLSLDEARTQQSARDYTHYAFSVAPE  
HIERVSELRQNGVEEWSNRSEGESLYFLDPDGHQLEIHAGD LASRLAACREKPYQGMVFY  
>GCA\_000215775  
MLTGLNHLTLAVADLPASIAFYRDLLGFRLEARWDQGAYLELGSLWLCLSLREPQCGGPAADYTHYAFGIAAAD  
FARFAAQLRAHGVREWKQNRSEGDSFYFLDPDGHRLEAHVGD LRSRLAACRQAPYAGMRFAD  
>GCA\_001554535  
MLTGLNHLTLAVADLPASIAFYRDLLGFRLEARWDQGAYLELGSLWLCLSLREPQCGGPAADYTHYAFGIAAAD  
FARFAAQLRAHGVREWKQNRSEGDSFYFLDPDGHRLEAHVGD LRSRLAARRQAPYAGMRFAD  
>GCA\_900146525  
MLTGLNHLTLAVADLPASIAFYRDLLGFRLEARWDQGAYLELGSLWLCLSLREPQYGGPAADYTHYAFGIAAAD  
FARFAAQLRAHGVREWKQNRSEGDSFYFLDPDGHRLEAHVGD LRSRLAACRQASYAGMRFAN  
>GCA\_000342205  
MLTGLNHLTLAVSNLDRSDFYRHLLGFIPHARWQGGAYLSLGPLWLCLSLDEARMQQRERDYPHYAFSVAPE  
HIEQVSELRQAGVEEWSNRSEGESLYFLDPDGHQLEIHAGD LASRLAACREKPYQGMVFY  
>GCA\_001432595  
MKLSGLNHLTISVANVDRIFNFYKDILGFTPKAKWKKGAYLSLGELWLCLSLDEVSVSSDYTHYCLSI SEDDI  
NEFRQKIKLLNIREWKNNQSEGESIYFLDPDGHKLEVHVGNLSTRLESCRKNPYEGMVFFDE  
>GCA\_000783975  
MLTGLNHLTLAVSDLDRSDFYRHLLGFTPHARWQGGAYLSLGTWLWLCLSLDEARTQPRARDYTHYAFSVAPE  
HIERVSELRQSGAEWWSNRSEGESLYFLDPDGHQLEIHAGD LASRLAACREKPYQGMVFY  
>GCA\_001453145

MLTGLNHLTLAVAELPASIAFYRDLLGFRLEARWDQGAYLELGSLWLCLSREPQYGGPAADYTHYAFGIAAAD  
FARFAAHLRAHGVREWKQNRSEGDSFYFLDPDGHRLAHLVGDLSRSLAACRQAPYAGMRFAD  
>GCA\_000793005  
MLTGLNHLTLAVADLPASIAFYRDLLGFRLEARWDQGAYLELGSLWLCLSREPQYGGPAADYTHYAFGIAAAD  
FARFAAHLRAHGVREWKQNRSEGDSFYFLDPDGHRLAHLVGDLSRSLAACRQAPYAGMRFAD  
>GCA\_000783275  
MLTGLNHLTLAVADLPVSIAPFYRDLLGFRLEARWDQGAYLELGSLWLCLSREPQYGGPAADYTHYAFGIAAAD  
FARFAAHLRAHGVREWKQNRSEGDSFYFLDPDGHRLAHLVGDLSRSLAACRQAPYAGMRFAD  
>GCA\_001536545  
MLTGLNHLTLAVSDLDRSDFYRHLGFTPHARWQGGAYLSLGPLWLCLSLEDERRTQQRERDYTHYAFSVAPE  
HIEQASQRLRQAGVEEWKSNRSEGESLYFLDPDGHQLEIHAGDLASRLAACREKPYQGMVFY  
>GCA\_001537565  
MLTGLNHLTLAVSDLDRSDFYRHLGFTPHARWQGGAYLSLGPLWLCLSLEDERRTQQRERDYTHYAFSIAPE  
HIEQASQRLRQAGVEEWKSNRSEGESLYFLDPDGHQLEIHAGDLASRLAACREKPYQGMVFY  
>GCA\_000297575  
MKLSGLNHLTISVANVDRSDFYRHLGFTPKAKWKKGAYLSLGLWLCLSLEDEVSVSSDYTHYCLSISEDDI  
DEFRQKIKLLNIREWKNNQSEGESLYFLDPDGHKLELVHGNLSTRLESCRKNPYEGMVFVFE  
>GCA\_001536585  
MLTGLNHLTLAVSDLDRSDFYRHLGFTPHARWQGGAYLSLGPLWLCLSLEDEKRTQQHERDYTHYAFSVAPE  
HIEQASQRLRQAGVEEWKSNRSEGESLYFLDPDGYQLEIHAGDLASRLAACREKPYQGMVFY  
>GCA\_001077565  
MKLSGLNHLTISVANVDRSDFYRHLGFTPKAKWKKGAYLSLGLWLCLSLEDEVSVSSDYTHYCLSISEDDI  
DEFRQKIKLLNIREWKNNQSEGESLYFLDPDGHKLELVHGNLSTRLESCRKNPYEGMVFVFE  
>GCA\_000793665  
MLTGLNHLTLAVADLPASIAFYRDLLGFRLEARWDQGAYLELGSLWLRLSREPQYGGPAADYTHYAFGIAAAD  
FARFAAQLRAHGVREWKQNRSEGDSFYFLDPDGHRLAHLVGDLSRSLAACRQAPYAGMRFAD  
>GCA\_001547955  
MLTGLNHLTLAVADLPASIAFYRDLLGFRLEARWDQGAYLELGSLWLCLSREPQYGGPAADYTHYAFGIAAAD  
FARFAAQLRAHGVREWKQNRSEGDSFYFLDPDGHRLAHLVGDLSRSLAACRQAPSAGMRFAD  
>GCA\_000629605  
MLTGLNHLTLAVADLPASIAFYRDLLGFRLEARWDQGAYLELGSLWLCLSREPQYGGPAADYTHYAFGIAAAD  
FARFAAQLRAHGVREWKQNRSEGNSFYFLDPDGHRLAHLVGDLSRSLAACRQAPYAGMRFAD  
>GCA\_000796065  
MLTGLNHLTLAVADLPASIAFYRDLLGFRLEARWDQGAYLELGSLWLCLSREPQYGGPAADYTHYAFGIAAAD  
FARFAAQLRAHGVREWKQNRSEGDSFYFLDPDGHRLAHLVGDLSRSLAACRQAPYAGMRFVD  
>GCA\_001060335  
MLTGLNHLTLAVSDLDRSDFYRHLGFTPHARWQGGAYLSLGLWLCLSLEDEARAQQSARDYTHYAFSVAPD  
HIEQVSELRQSGVKEWKSNRSEGESLYFLDPDGHQLEIHASDLASRLAACREKPYQGMVFY  
>GCA\_001063125  
MLTGLNHLTLAVSNLDRSDFYRHLGFI PHARWQGGAYLSLGPLWLCLSLEDEARMQQRERDYTHYAFSVAPE  
HIEQVSELRQAGVEEWKSNRSEGESLYFLDPDGHQLEIHAGDLASRLAACREKPYQGMVFY  
>GCA\_001065405  
MLTGLNHLTLAVSNIDRSDFYRHLGFI PHARWQGGAYLSLGPLWLCLSLEDETRMQQRERDYTHYAFSVAPE  
HIEQVSELRQAGVEEWKSNRSEGESLYFLDPDGHQLEIHAGDLASRLAACREKPYQDMVFY  
>GCA\_001889685  
MLTGLNHLTLAVSDLDRSDFYRHLGFTPHARWQGGAYLSLGLWLCLSLEDEARTQPRARDYTLYAFSVAPE  
HIERVSELRQSGAEWKSNRSEGESLYFLDPDGHQLEIHAGDLASRLAACREKPYQGMVFY  
>GCA\_001454395  
MLTGLNHLTLAVADLPASIAFYRDLLGFRLEARWDQGAYLELGSLWLCLSREPQYGGPAADYTHYAFGIAAAD  
FARFAAQLRAHGVREWKQNRSEGDSFYFLDPDGHRLAHLVGDLSRSLAACRQAPYVGMRFAD  
>GCA\_000633715  
MLTGLNHLTLAVSDLDRSDFYRHLGFTPHARWQGGAYLSLGPLWLCLSLEDEKRTQQHERDYTHYAFSVAPE  
HIEQASQRLRQAGVEEWKSNRSEGESLYFLDPDGHQLEIHAGDLASRLAACREKPYQGMVFY  
>GCA\_000468935

MLTGLNHLTLAVADLPASIAFYRDLLGFRLEARWDQGAYLELGSLWLCLSREPQYGGPAADYTHYAFGIAAAD  
FARFAAQRAHGVREWKQNRSEGDSFYFLDPDGHRLAHVGDLSRSLAACRQAPYAGMRFAD  
>GCA\_000148745  
MLTGLNHLTLAVADLPASIAFYRDLLGFRLEARWDQGAYLELGSLWLCLSREPQYGGPAADYTHYAFGIAAAD  
FARFAAQLRAHGVREWKQNRSEGDSFYFLDPDGHRLAHVGDLSRSLAACRQAPYAGMRFAN  
>GCA\_000797285  
MLTGLNHLTLAIADLPASIAFYRDLLGFRLEARWDQGAYLELGSLWLCLSREPQYGGPAADYTHYAFGIAAAD  
FARFAAQLRAHGVREWKQNRSEGDSFYFLDPDGHRLAHVGDLSRSLAACRQAPYAGMRFAD  
>GCA\_000581995  
MKLSGLNHLTISVANVDRSDFYRHLGFTPHARWQGGAYLSLGELWLCLSLEDEVSISSDYTHYCFSSIEDNI  
DEFRQKIKMMNIREWKNNQSEGESIYFLDPDGHKLEHVHGNLSTRLESCRKNPYEGMVFFDE  
>GCA\_000738535  
MLTGLNHLTLAVSDLDERSDFYRHLGFTPHARWQGGAYLSLGALWLCLSLEDEARMLPRERDYTHYAFSVAPK  
HIERVSELRQAGVEEWKSNRSEGESLYFLDPDGHQLEIHAGDLASRLAACREKPYQGMVFY  
>GCA\_001007555  
MLTGLNHLTLAVSDLDERSDFYRHLGFTPHARWQGGAYLSLGALWLCLSLEDEARTPPRARDYTHYAFSVAPE  
HIERVSELRQSGAEWKSNRSEGESLYFLDPDGHQLEIHAGDLASRLAACREKPYQGMVFY  
>GCA\_000418815  
MLTGLNHLTLAVSDLDERSDFYRHLGFTPHARWQGGAYLSLGALWLCLSRDEARAQQSARDYTHYAFSVAPE  
HIEQVSELRQNGVKEWKSNRSEGESLYFLDPDGHQLEIHAGDLASRLAACREKPYQGMVFY  
>GCA\_001672055  
MLTGLNHLTLAVSNLDRSDFYRHLGFI PHARWQGGAYLSLGPLWLCLSLEDETRMQQHERDYTHYAFSVAPE  
HIEQVSELRQAGVEEWKSNRSEGESLYFLDPDGHQLEIHAGDLASRLAAYREKPYQGMVFY  
>GCA\_000341565  
MLTGLNHLTLAVADLPASIAFYRDLLGFRLEARWDQGAYLELGSLWLCLSREPQYGGPAADYTHYAFGIAAAD  
FARFAAQLRAHGVREWKQNRSEGDSFYFLDPDGHRLAHVGDLLSRLAACRQAPYAGMRFAD  
>GCA\_001444845  
MLTGLNHLTLAVADLPASIAFYRDLLGFRLEARWDQGAYLELGSLWLCLSREPQYGGPAADYTHYAFGIAAAD  
FARFAAQLRAHGVREWKQNRNEGDSFYFLDPDGHRLAHVGDLSRSLAACRQAPYAGMRFAD  
>GCA\_000791705  
MLTGLNHLTLAVADLPASIAFYRDLLGFRLEARWDQGAYLELGSLWLCLSREPQYGGPAADYTHYAFGIAAAD  
FARFAAHLRAHGVREWKQNRSEGDSFYFLDPDGHRLAHVGDLSRSLAACRQAPYAGMRFAD  
>GCA\_000794725  
MLTGLNHLTLAVADLPASIAFYRDLLGFRLEARWDQGAYLELGSLWLCLSREPQYGGPAADYTHYAFGIAAAD  
FARFAAQLRAHGVREWKQNRSEGDSFYFLDPDGHRLAHVGDLSRSLAAFRQAPYAGMRFAD  
>GCA\_001449435  
MLTGFNHLTLAVADLPASIAFYRDLLGFRLEARWDQGAYLELGSLWLCLSREPQYDGPAAEDYTHYAFGIAAAD  
FARFAAHLRGHGVREWKQNRSEGDSFFLDPDGHRLAHVGDLSRSLAACRQTPYAGMRFAD  
>GCA\_001294565  
MLTGLNHLTLAVSDLDERSDFYRHLGFTPHARWQGGAYLSLGSLWLCLSLEDERRTQQHERDYTHYAFSVAPE  
HIEQASQQLRQAGVEEWKSNRSEGESLYFLDPDGHQLEIHAGDLASRLAACREKPYQGMVFY  
>GCA\_001537145  
MLTGLNHLTLAVSDLDERSDFYRHLGFTPHARWQGGAYLSLGPLWLCLSLEDEKRTQQHERDYTHYAFSVAPE  
HIEQASQRLRQAGVKEWKSNRSEGESLYFLDPDGHQLEIHAGDLASRLAACREKPYQGMVFY  
>GCA\_000647635  
MLTGLNHLTLAVADLPASIAFYRDLLGFRLEARWDQGAYLELGSLWLCLSREPQYGGPAADYTHYAFGIAAAD  
FARFAAQLRAHGVREWRQNRSEGDSFYFLDPDGHRLAHVGDLSRSLAACRQAPYAGMRFAD  
>GCA\_000506005  
MLTGLNHLTLAVADLPASIAFYRDLLGFRLEARWDQGAYLELGSLWLCLSRDPQYGGPAADYTHYAFGIAAAD  
FARFAAQLRAHGVREWKQNRSEGDSFYFLDPDGHRLAHVGDLSRSLAACRQAPYAGMRFAD  
>GCA\_000481865  
MLTGLNHLTLAVADLPASIAFYRDLLGFRLEARWDKGAYLELGSLWLCLSREPQYGGPAADYTHYAFGIAAAD  
FARFAAQLRAHGVREWKQNRSEGDSFYFLDPDGHRLAHVGDLSRSLAACRQAPYAGMRFAD  
>GCA\_000408865



MLTGLNHLTLAVADLPASIAFYRDLLGFRLEARWDQGAYLELGSLWLCLSREPOYGGPAADYTHYAFGIAAAD  
FARFAAQLRAHGVREWKQNRSEGDSFYFLDPDGHRLAHVGDLSRSLAACRQAPYAGMRFAD  
>GCA\_000481205  
MLTGLNHLTLAVADLPASIAFYRDLLGFRLEARWDQGAYLELGSLWLCLSREPOYGGPAADYTHYAFGIAAAD  
FARFAAQLRAHGVREWKQNRSEGDSFYFLDPDGHRLAHVGDLSRSLAACRQAPYAGMRFAD  
>GCA\_001067375  
MLTGLNHLTLAVSDLDRSDFYRHLGFTPHARWQGGAYLSLGSLWLCLSLEDERRTQQRERDYTHYAFSIAPE  
HIEQASQRLRQAGVKEWKSNRSEGESLYFLDPDGHQLEIHAGDLASRLAACREKPYQGMVFY  
>GCA\_000521905  
MLTGLNHLTLAVSDLDRSDFYRHLGFTPHARWQGGAYLSLGALWLCLSLEDEARTQPRARDYTHYAFSVAPE  
HIERVSELRQSGAEWKSNRSEGESLYFLDPDGHQLEIHAGDLASRLAACREKPYQGMVFY  
>GCA\_000359505  
MLTGLNHLTLAVADLPASIAFYRDLLGFRLEARWDQGAYLELGSLWLCLSREPOYGGPAADYTHYAFGIATAD  
FARFAAQLRAHGVREWKQNRSEGDSFYFLDPDGHRLAHVGDLSRSLAACRQAPYAGMRFAD  
>GCA\_000783915  
MLTGLNHLTLAVSDLDRSDFYRHLGFTPHARWQGGAYLSLGPLWLCLSLEDERRTQQHERDYTHYAFSVAPE  
HIEQASQRLRQAGVEWKSNRSEGESLYFLDPDGHQLEIHAGDLASRLAACREKPYQGMVFY  
>GCA\_001068085  
MLTGLNHLTLAVSDLDRSDFYRHLGFTPHARWQGGAYLSLGALWLCLSRDEARAQQSARDYTHYAFSVAPD  
HIEQVSELRQNGVKEWKSNRSEGESLYFLDPDGHQLEIHAGDLASRLAACREKPYQGMVFY  
>GCA\_001578415  
MLTGLNHLTLAVADLPASIAFYRDLLGFRLEARWDQGAYLELGSLWLCLSREPOYGGPAADYTHAFGIAAADF  
ARFAAQLRAHGVREWKQNRSEGDSFYFLDPDGHRLAHVGDLSRSLAACRQAPYAGMRFAD  
>GCA\_000481065  
MLTGLNHLTLAVADLPASIAFYRDLLGFRLEKARWDQGAYLELGSLWLCLSREPOYGGPAADYTHYAFGIAAAD  
FARFAAQLRAHGVREWKQNRSEGDSFYFLDPDGHRLAHVGDLSRSLAACRQAPYAGMRFAD  
>GCA\_001066075  
MLTGLNHLTLAVADLPASIAFYRDLLGFRLEARWDQGAYLELGSLWLCLSREPOCGGPAADYTHYAFGIAAAD  
FARFAAQLRAHGVREWKQNRSEGDSFYFLDLDPDGHRLAHVGDLSRSLAACRQAPYAGMRFAD  
>GCA\_000292365  
MLTGLNHLTLAVHDLDRSDFYHLLGFIPHARWQGGAYLSLGALWLCLSVDESRTQPQNARDYTHYAFSVAPE  
HMEQVSELRQSGVEWKSNRSEGESLYFLDPDGHQLEIHAGDLASRLAACREIPYQGMVFY  
>GCA\_000521925  
MLTGLNHLTLAVSDLDRSDFYRHLGFTPHARWQGGAYLSLGSLWLCLSLEDERRTQQHERDYTHYAFSVAPE  
HIEQASQRLRQAGVEWKSNRSEGESLYFLDPDGHQLEIHAGDLASRLAACREKPYQGMVFY  
>GCA\_001060585  
MLTGLNHLTLAVSDLDRSDFYRHLGFTPHARWQGGAYLSLGPLWLCLSLEDERRTQQRERDYTHYAFSVAPE  
HIEQASQRLRQAGIEWKSNRSEGESLYFLDPDGHQLEIHAGDLASRLAACREKPYQGMVFY  
>GCA\_000481405  
MLTGLNHLTLAVADLPASIAFYRDLLGFRLEARWDQGAYLELGSLWLCLSREPOYGGPAADYTHYVFGIAAAD  
FARFAAQLRAHGVREWKQNRSEGDSFYFLDPDGHRLAHVGDLSRSLAACRQAPYAGMRFAD  
>GCA\_001750225  
MLSGLNHLTLAVADLPASIAFYRDLLGFRLEARWDQGAYLELGSLWLCLSREPOYGGPAADYTHYAFGIAAAD  
FARFAAQLRAHGVREWKQNRSEGDSFYFLDPDGHRLAHVGDLSRSLAACRQAPYAGMRFAD  
>GCA\_001643155  
MLTGLNHLTLAVSDLDRSDFYRHLGFTPHARWQGGAYLSLGALWLCLSLEDESRTQQRERDYTHYAFSVAPE  
HIERVSELRQNGVKEWKSNRSEGESLYFLDPDGHQLEIHAGDLASRLAACREKPYQGMVFY  
>GCA\_000258285  
MLTGLNHLTLAVADLPASIAFYRDLLGFRLEARWDQGAYLELGSLWLCLSREPOCGGPAADYTHYAFGIAAAD  
FARFAAQLRAHGVREWKQNRSEGDSFYFLDPDGHRLAHVGDLSRSLAACRQAPYAGMRFAD  
>GCA\_001756295  
MLTGLNHLTLAVSNLDRSDFYRHLGFTPHARWQGGAYLSLEPLWLCLSLEDETRMQQRERDYTHYAFSVAPE  
HIEQVSELRQAGVEWKSNRSEGESLYFLDPDGHQLEIHAGDLASRLAACRKKPYQGMVFY  
>GCA\_000783615

MLTGLNHLTLAASDLDRSFEFYRHLLGFIPHARWQGGAYLSLGALWLCLSRDEARAQQSARDYTHYAFSVAPQ  
HIEQVSERLRQNGVKWKSNRSEGESLYFLDPDGHQLEIHAGDLASRLAACREKPYQGMVY  
>GCA\_001975745  
MLIGLNHLTLAVSNLDRSFDYRHLGLFIPHARWQGGAYLSLGPLWLCLSLDETRMQQRERDYTHYAFSVAPE  
HIEQVSERLRQAGVEEWKSNRSEGESLYFLDPDGHQLEIHAGDLASRLAACREKPYQGMVY  
>GCA\_000264275  
MLTGLNHLTLAVSNLDRSFDYRHLGLFIPHARWQGGAYLSLGPLWLCLSLDETRMQQRERDYTHYAFSVAPE  
HIEQVSERLRQAGVEEWKSNRSEGESLYFLDPDGHQLEIHAGDLASRLAACREKPYQGMVY  
>GCA\_000756575  
MLTGLNHLTLAVADLPASIAFYRDLLGFRLEARWDQGAYLELGSLWLCLSRPQCGGPAADYTHYAFGIDAAD  
FARFAAQLRAHGVREWKQNRSEGDSFYFLDPDGHRLAHVGDLSRLAACRQAPYAGMRFAD  
>GCA\_001909165  
MLTGLNHLTLAVQDLDRSVDYHLLGFIPHARWQGGAYLSLGALWLCLSVDESRTFQPNARDYTHYAFSVAPE  
HMEQVSERLRQSGVEEWKSNRSEGESLYFLDPDGHQLEIHAGDLASRLAACRENPYQGMVY  
>GCA\_001065325  
MLTGLNHLTLAVSNLDRSFDYRHLGLFIPHARWQGGAYLSLGPLWLCLSLDETRMQQRERDYTHYAFSVAPE  
HIEQVSERLRQAGVEEWKSNRSEGESLYFLDPDGHQLEIHAGDLASRLAACRKKPYQGMVY  
>GCA\_000792095  
MLTGLNHLTLAVADLPASIAFYRDLLGFRLEARWDQGAYLELGSLWLCLSRPQYGGPAADYTHYAFGIAAAD  
FARFTAQLRAHGVREWKQNRSEGDSFYFLDPDGHRLAHVGDLSRLAACRQAPYAGMRFAD  
>GCA\_000791825  
MLTGLNHLTLAVADLPASIAFYRDLLGFRLEARWDQGAYLELGSLWLCLSRPQYGGPAADYTHYAFGIAAAD  
FARFAAQLRAHGVREWKQNRSEGDSFYFLSDDGHRLAHVGDLSRLAACRQAPYAGMRFAD  
>GCA\_000506285  
MLTGLNHLTLAVADLPASIAFYRDLLGFRLEARWDQGAYLELGSLWLCLSRPQCDGPAADYTHYAFGIAAAD  
FARFAAQLRAHGVREWKQNRSEGDSFYFLDPDGHRLAHVGDLSRLAACRQAPYAGMRFAD  
>GCA\_001061875  
MLTGLNHLTLAVADLPARIAFYRDLLGFRLEARWDQGAYLELGSLWLCLSRPQYGGPAADYTHYAFGIAAAD  
FARFAAQLRAHGVREWKQNRSEGDSFYFLDPDGHRLAHVGDLSRLAACRQAPYAGMRFAD  
>GCA\_000369025  
MKLSGLNHLTISVANVDRSFSFYKDVLGFTPRAKWNKGAYLSLGELWLCLSLDEVSITSYTHYCFSSIEDHI  
DAFRQKIKLLNIREWKNNQSEGESIYFLDPDGHKLEVLHGNLSSRLESCKNPYEGMVFFDE  
>GCA\_000790655  
MLTGLNHLTLAVADLPASIAFYRDLLGFRLEARWDQGAYLELGSLWLCLSRPQYGGPAADYMHYAFGIAAAD  
FARFAAQLRAHGVREWKQNRSEGDSFYFLDPDGHRLAHVGDLSRLAACRQAPYAGMRFAD  
>GCA\_000790685  
MLTGLNHLTLAVADLPASIAFYRDLLGFRLEARWDQGAYLELGSLWLCLSRPQYGGPAADYTHCAFGIAAAD  
FARFAAQLRAHGVREWKQNRSEGDSFYFLDPDGHRLAHVGDLSRLAACRQAPYAGMRFAD  
>GCA\_000186665  
MKLSGLNHLTISVANVDRSFNFYKDILGFTPKAKWKKGAYLSLGELWLCLSLDEVSISSDYTHYCFSSIEDNI  
DEFRQKIKMMNIREWKNNQSEGESIYFLDPDGHKLEVLHGNLSTRLESCRKNPYEGMVFFDE  
>GCA\_001554585  
MLTGLNHLTLAVADLPASIAFYRDLLGFRLEARWDQGAYLELGSLWLCLSRPQYGGPAADYAHYAFGIAAAD  
FARFAAQLRAHGVREWKQNRSEGDSFYFLDPDGHRLAHVGDLSRLAACRQAPYAGMRFAD  
>GCA\_001431165  
MLTGLNHLTLAVADLPASIAFYRDLLGFRLEARWDQGAYLELGSLWLCLSQEPQYGGPAADYTHYAFGIAAAD  
FARFAAHLRAHGVREWKQNRSEGDSFYFLDPDGHRLAHVGDLSRLAACRQAPYAGMRFAD  
>GCA\_000481185  
MLTGLNHLTLAVADMPASIAFYRDLLGFRLEARWDQGAYLELGSLWLCLSRPQYGGPAADYTHYAFGIAAAD  
FARFAAQLRAHGVREWKQNRSEGDSFYFLDPDGHRLAHVGDLSRLAACRQAPYAGMRFAD  
>GCA\_000226155  
MLTGLNHLTLAVAVLPASIAFYRDLLGFRLEARWDQGAYLELGSLWLCLSRPQYGGPAADYTHYAFGIAAAD  
FARFAAQLRAHGVREWKQNRSEGDSFYFLDPDGHRLAHVGDLSRLAACRQAPYAGMRFAD  
>GCA\_000796505

MLTGLNHLTLAVADLPASIAFYRDLLGFRLEARWDQGAYLELGSLWLCLCSREPQYGRPAADYTHYAFGIAAAD  
FARFAAQLRAHGVREWKQNRSEGDSFYFLDPDGHRLAHVGDLSRSLAACRQAPYAGMRFAD  
>GCA\_001415145  
MKLSGLNHLTISVENVDRSFSFYKDVLGFTPRAKWNKGAYLSLGELWLCLCSLDEVRIITSDYTHYCFSSIEDDI  
DEFRQKIKLLNIREWKNNQSEGESIYFLDPDNGHKLEIHVGNLSTRLDSCCKNPYEGMVFFDE  
>GCA\_900083925  
MLTGLNHLTLAVSDLDLRSDFDFYRHLLGFTPHARWQGGAYLSLGALWLCLCSRDEARAQQSARDYTHYAFSVAPD  
HIEQVSERLRQSGVKEWKSNRSEGESLYFLDPDGHQLEIHAGDLASRLAACREKPYQGMVFY  
>GCA\_900144765  
MLTGLNHLTLAVAELPASIAFYRDLLGFRLEARWDQGAYLELGSLWLCLCSREPQYGGPAADYTYAFGIAAAD  
FARFAAHLRAHGVHEWKQNRSEGDSFYFLDPDGHRLAHVGDLSRSLAACRQAPYAGMRFAD  
>GCA\_001536365  
MLTGLNHLTLAVSDLDLRSDFDFYRHLLGFTPHARWQGGAYLSLGSLWLCLCSLDERRTQQRERDYTHYAFSVAPE  
HIEQASQRLRQAGVEEWKSNRSEGESLYFLDPDGHQLEIHAGDLASRLAACREKPYQGMVFY  
>GCA\_001066015  
MLTGLNHLTLAVSDLDLRSDFDFYRHLLGFTPHARWQGGAYLSLGSLWLCLCSLDERRTQQHERDYTHYAFSIAPE  
HIEQASQRLRQAGVEEWKSNRSEGESLYFLDPDGHQLEIHAGDLASRLAACREKPYQGMVFY  
>GCA\_000714515  
MLTGLNHLTLAVADLPASIAFYRDLLGFRLEARWDQGAYLELGSLWLCLCSREPPGPAADYTHAFGIAAADFAR  
FAAQLRAHGVREWKQNRSEGDSFYFLDPDGHRLAHVGDLSRSLAACRQAPYAGMRFAD  
>GCA\_001539985  
MLTGLNHLTLAVSNLDRSDFDFYRHLLGFIPHARWQGGAYLSLGPLWLCLCSLDETRMQQRERDYTHYAFSVAPE  
HIEQVSERLRQAGVEEWKNNRSEGESLYFLDPDGHQLEIHAGDLASRLAACREKPYQGMVFY  
>GCA\_000568235  
MLTGFNHLTLAVADLPASIAFYRDLLGFRLEARWDQGAYLELGSLWLCLCSREPQYDGPADYTHYAFGIAAAD  
FARFAAHLRGHGVREWKQNRSEGDSFYFLDPDGHRLAHVGDLSRSLAACRQTPYAGMRFAD  
>GCA\_000399685  
MKLSGLNHLTISVENVDRSFSFYKDVLGFTPRAKWNKGAYLSLGELWLCLCSLDEVSISSDYTHYCFSSIEDDI  
DEFRQKIKLNMNIHEWKNNQSEGESIYFLDPDGHKLEVHVGTLSRSLQSCCKNPYEGMVFFDE  
>GCA\_000399705  
MKLSGLNHLTISVENVDRSFSFYKDVLGFSPRAKWNKGAYLSLGELWLCLCSLDEVSISSDYTHYCFSSIEDHI  
DEFRQKIKLLNIREWKNNQSEGESIYFLDPDGHKLEVHVGTLSRSLKSCCKNPYEGMVFFN  
>GCA\_900148255  
MLTGLNHLTLAVADLPASIAFYRDLLGFRLEARWDQGAYLELGSLWLCLCSREPQYGGPAADYTHYAFGIAAAD  
FARFAAQLRAHGVREWKQNRSEGDSFYFLDPDGHRLAHVGDLSRSLAACRQAPYAGMRFAD  
>GCA\_000588275  
MKLSGLNHLTISVENVDRSFSFYKDVLGFTPRAKWNKGAYLSLGELWLCLCSLDEVSISSDYTHYCFSSIEDDI  
DEFRQKIKLLNIREWKNNQSEGESIYFLDPDGHKLEVHVGNLSSRLESCCKKNLYEGMIFF  
>GCA\_900144795  
MLTGLNHLTLAVAELPASIAFYRDLLGFRLEARWDQGAYLELGSLWLCLCSREPQYGGPAADYTYAFGIAAAD  
FARFAAHLRAHGVHEWKQNRSEGDSFYFLDPDGHRLAHVGDLSRSLAACRQAPYAGMRFAD  
>GCA\_000480725  
MLTGLNHLTLAVADLPASIAFYRDLLGFRLEARWDQGAYLELGSLWLCLCSREPQYGGPAADYTHYAFGIAAAD  
FARFAAQLRAHGVREWKQNRSEGDSFYFLDPDGHRLAHVGDLSRSLAACRQAPYAGMRFAD  
>GCA\_001867255  
LTGLNHITIAANDISRSFNFYVEILGFTPKARWATGAYLCLGDLWLCLCSAEKVSSRGDYTHYAFSIQSEDFDR  
FANHLKSCGITTEWKS NKSEGKSIYLLDPDGHKLEIHGDGLVSRSLNSCMKHPYEDMIFFN  
>GCA\_000191145  
MKLSGLNHLTISVENVDRSFSFYKDVLGFTPRAKWNKGAYLSLGELWLCLCSLDEVRIITSDYTHYCFSSIEDDI  
DEFRQKIKLLNIREWKNNQSEGESIYFLDPDNGHKLEVHVGNLSTRLDSCCKNPYEGMV  
>GCA\_000831565  
TTSVSNLQSSLTFWRDLLGLQLHAEWGTGAYLTCGDLWLCLCSYDVSRSYVAPQKSDYTHYAFSIAPEDFEPFS  
YKQSGVTVWKDNKSEGSFYFLDPDGHKLELHVGDLSRSLAACRERPYSGMRF  
>GCA\_000633025

MLSGLNHLTLAVSQAAPSVAFYQQLGMLTLHARWDSGAYLSCGDLWLCLSLDPQRRVTPPEESDYTHYAFSIS  
EADFASFAARLEAAGVAIWKLNRSSEGASHYFLDPDGHKLELHVGSQAQRLAACRE  
>GCA\_000791025  
AYRTSPVGRRLNVPDASRLLLGVLRRFTEAYPDLQLELSVEDRMVDIVADGYDAGIRYGGTVPQDMVAVP  
LTGELRWVWKQNRSEGDSFYFLDPDGHRLAHVGDRLRSRLAACRQAPYAGMRF  
>GCA\_000412735  
MLTGLNHLTLAVADLPASIAFYRDLLGFRLEARWDQGAYLELGSLWLCLSLREPQYGGPAADYTHYAFGIAAAD  
FARFAAQLRAHGVREWKQNRSEGDSFYFLDPDGHRLAHVGDRLRSRLAACRQAP  
>GCA\_000372625  
MLSGLNHLTLAVSQAAPSVAFYQQLGMLTLHARWDSGAYLSCGDLWLCLSLDPQRRVTPPEESDYTHYAFSIS  
EADFASFAARLEVAGVAVWKLNRSSEGASHYFLDPDGHKLELHVGSQAQRLAAC  
>GCA\_900144895  
MLTGLNHLTLAVAELPASIAFYRDLLGFRLEARWDQGAYLELGSLWLCLSLREPQYGGPAADYTHYAFGIAAAD  
FARFAAHLRAHGVHEWKQNRSEGDSFYFLDPDGHRLAHVGDRLRSRLAACRQA  
>GCA\_900144845  
MLTGLNHLTLAVAELPASIAFYRDLLGFRLEARWDQGAYLELGSLWLCLSLREPQYGGPAADYTHYAFGIAAAD  
FARFAAHLRAHGVHEWKQNRSEGDSFYFLDPDGHRLAHVGDRLRSRLAACRQ  
>GCA\_000498215  
VSNLQSSLTFWRDLLGLQLHAEWGTGAYLTCGDLWLCLSYDVSRSYVAPQKSDYTHYAFSIAPEDFEPFSYKL  
KQSGVTWVKDNKSEGQSFYFLDPDGHKLELHVGDLSRLAQCRERPYSGMRF  
>GCA\_001399815  
MLSGLNHLTLAVSQAAPSVAFYQQLGMLTLHARWDSGAYLSCGDLWLCLSLDPQRRVTPPEESDYTHYAFSIS  
EADFASFAARLEAAGVAVWKLNRSSEGASHYFLDPDGHKLELHVGSQAQRLA  
>GCA\_001067795  
LCMCLSRSRVQPLARWSSITCQNSSLRADSI AFFAGTRSRAIRLTYAFGIAAADFARFAAQLRAHGVREWKQ  
NRSEGDSFYFLDPDGHRLAHVGDRLRSRLAACRQAPYAGMRF  
>GCA\_000465635  
MKLSGLNHLTISVANVDRSFNFYKDVLGFTPKAKWKKGAYLSLGLWLCLSLDEVSISSDYTHYCLSI SEDNI  
DEFRQKIKMMNIPWKTNQSEGESIYFLDPDGHKLELVHGNLSSRLESCK  
>GCA\_000572265  
DLPASIAFYRDLLGFRLEARWDQGAYLELGSLWLCLSLREPQYGGPAADYTHYAFGIAAADFARFAAQLRAHGV  
REWKQNRSEGDSFYFLDPDGHRLAHVGDRLRSRLAACRQAPYAGMRFAD  
>GCA\_000414255  
MLTGLNHLTLAVADLPASIAFYRDLLGFRLEARWDQGAYLELGSLWLCLSLREPQYGGPAADYTHYAFGIAAAD  
FARFAAQLRAHGVREWKQNRSEGDSFYFLDPDGHRLAHVGDRLRSRLAA  
>GCA\_001641855  
SLTFWRDLLGLQLHAEWGTGAYLTCGDLWLCLSYDVSRSYVAPQKSDYTHYAFSIAPEDFEPFSYKLKQSGVT  
VWKNKSEGQSFYFLDPDGHKLELHVGDLSRLAQCRERPYSGMRF  
>GCA\_000350325  
MLSGLNHLTLAVSQAAPSVAFYQQLGMLTLHARWDSGAYLSCGDLWLCLSLDPQRRVTPPEESDYTHYAFSIS  
EADFASFAARLEAAGVAIWKLNRSSEGASHYFLDPDGHKLELHV  
>GCA\_001268725  
FAGVAAHAEDTGAYLTCADLWICLSYDVSRYVAPQESDYTHYAFSIAAEDFEPFAYKQAGVTWVKDNKSE  
GQSFYFLDPDGHKLELHVDLASRLEQYREKPYSGMRF  
>GCA\_001975285  
MLQSLNHLTLAVSNLQTSLTFWRDLLGLQLHAEWDTGAYLTCGDLWVCLSYDVSRYVAPQESDYTHYAFSIA  
AEDFEPFSYKLKQSGVTWVKDNKSEGQSFYFVDPDGHKL  
>GCA\_000615565  
MLTGLNHLTLAVADLPASIAFYRDLLGFRLEARWDQGAYLELGSLWLCLSLREPQYGGPAADYTHYAFGIAAAD  
FARFAAQLRAHGVREWKQNRSEGDSFYFLDPDGHRLA  
>GCA\_001247585  
LTAEWDTGAYLTCGDLWVCLSYDVSCNYVAPQECDYTHYAFSIAPEDFEPFSYKLKQAGVTWVKDNKSEGQSF  
YFLDPDGHKLELHVGDLSRLAQCREKPYSGMRF  
>GCA\_001750425

LEARWDQGAYLELGSLWLCLSREPQYGGPAADYTHYAFGIAAADFARFAAQLRAHGVREWKQNRSEGDSFYFL  
DPDGRLEAHVGDLSRLAACRQAPYAGMRFAD  
>GCA\_001605875  
EARWDQGAYLELGSLWLCLSREPQYGGPAADYTHYAFGIAAADFARFAAQLRAHGVREWKQNRSEGDSFYFLD  
PDGHRLEAHVGDLSRLAACRQAPYAGMRFAD  
>GCA\_000603845  
AEWDTGAYLTCGDLWVCLSYDVSCNYVAPQECDYTHYAFSIAPEDFEFPSYKQAGVTWVWKNKSEGQSFYF  
LDPDGHKLELHVGDLSRLAQCREKPYSGMRF  
>GCA\_001037435  
WKHAGTRAPISNWWHCGCACPGSRSTAGRPRTTYAFGIAAADFARFAAQLRAHGVREWKQNRSEGDSFYFLDP  
DGRLEAHVGDLSRLAACRQAPYAGMRFAD  
>GCA\_001045515  
MLTGLNHLTLAVADLPASIAFYRDLLGFRLEARWDQGAYLELGSLWLCLSREPQYGGPAADYSVHDQPLPLRH  
AGTRSRRETRPASAVPYL  
>GCA\_001061585  
GYTNFPDLICHSHPHYQTENNTVQYAFGIAAADFARFAAQLRAHGVREWKQNRSEGDSFYFLDPDGRLEAHVG  
DLRSRLAACRQAPYAGMRF  
>GCA\_000300735  
LSYDVSRNYVATQEGDYTHYAFSIAPEDFEFPSYKQAGVTWVWKNKSEGQSFYFLDPDGHMLELHVGDLSR  
LVQCRERLYSGMRF  
>GCA\_000188335  
LSYDVSRNYVAPQECDYTHYAFSIAPEDFEFPSYKQAGVTWVWKNKSEGQSLYFLDPDGHKLELHVGDLS  
RLAQCREKPYSGMRF  
>GCA\_001777135  
MLSGLNHLTLAVSQAAPSVAFYQQLGMTLHARWDSGAYLSCGDLWLCLSLDPQRRVTPPEESDYTHYAFSIS  
EADFASFAPALRL  
>GCA\_001766715  
MLSGLNHLTLAVSQAAPSVAFYQQLGMTLHARWDSGAYLSCGDLWLCLSLDPQRRVTPPEESDYTHYAFSIS  
EADFASFAPALR  
>GCA\_900085705  
MLSGLNHLTLAVSQAAPSVAFYQQLGMTLHARWDSGAYLSCGDLWLCLSLDPQRRVTPPEESDYTHYAFSIS  
EADFASFAARLE  
>GCA\_001901735  
MLSGLNHLTLAVSQAAPSVAFYQQLGMTLHARWDSGAYLSCGDLWLCLSLDPQRRVTPPEESDYTHYAFSIS  
EADFASFAPALR  
>GCA\_001061895  
MLTGLNHLTLAVADLPARIAFYRDLLGFRLEARWDQGAYLELGSLWLCLSREPQYGGPAADYTHRRADNAIGV  
I  
>GCA\_001893225  
PQESDYTHYAFSVAEEEEFAGVVALLAQAGAEVWKNRSEGASYYFLDPDGHKLELHVGNLAQRLAACRERPYK  
GMVFFD  
>GCA\_000617365  
AYQKSDYTHYAFSIAPEDFEFPSYKQSGVTWVWKNKSEGQSFYFLDPDGHKLELHVGDLSRLAQCRERPY  
SGMRF  
>GCA\_001863405  
MKLSGLNHLTISVANVDRSFNFYKDILGFTPKAKWKKGAYLSLSELWVCLSLDEVSVSSDYTHYCLSISED  
DEFRQ  
>GCA\_000962405  
MLQSLNHLTLAVSNLQTSITFWRDLLGLQLHAEDWTGAYLTCGDLWVCLSYDVSCNYVAPQECDYTHYAFSIA  
PEDF  
>GCA\_000705235  
MLTGLNHLTLAVADLPASIAFYRDLLGFRLEARWDQGAYLELGSLWLCLSREPQYGGPAADYTHYAFGIAAAD  
F  
>GCA\_000283055

YTHYAFGIAAADFARFAAQLRAHGVREWKQNRSEGDSFYFLDPDGRLEAHVGDLSRLAACRQAPYAGMRFA  
D  
>GCA\_001075925  
SCGDLWLCLSLDPQRRVTPPEESDYTHYAFSISEADFASFAARLEAAGVAIWKLNKSEGASHYFLDPDGHKLE  
L  
>GCA\_000473745  
MLTGLNHLTLAVADLPASIAFYRDLLGFRLEARWDQAYLELGSLWLCLSRPQYGGPAADYTHYAFGIAA  
>GCA\_000173695  
YCPYRHLSYCVSRNYVAPQESDYTHYAFSIAAEDFEPFSYKQSGVTWVWKNKSEGQSFYFVDPDGHKL  
>GCA\_000747825  
YCPYRHLLYYVSRNYVAPQESDYTHYAFSIAAEDFEPFSYKQSGVTWVWKNKSEGQSFYFVDPDGHKL  
>GCA\_001058735  
VGNKDWNVLTTIMDSGQTSFYFLDPDGHKLELHVGSAAARLAACREKPYAGMVFTSDEA
