# Supplementary material for: Widespread Fosfomycin Resistance in Gram-Negative Bacteria Attributable to the Chromosomal fosA Gene
Source: PubMed Central journal article supplement (PMC5574708; doi:10.1128/mbio.00749-17), 2017-08-29
Supplement: mbo004173458st1.pdf [file mbo004173458st1.pdf]

**Supplementary Table.** Genome data submitted by year groups.

| <b>Year submitted</b> | <b>Total genomes</b> | <b><i>fosA</i>-containing genomes</b> | <b>%</b> |
|-----------------------|----------------------|---------------------------------------|----------|
| <b>2002-2011</b>      | 398                  | 77                                    | 19.3     |
| <b>2012-2014</b>      | 5546                 | 1489                                  | 26.8     |
| <b>2015-2017</b>      | 12184                | 4084                                  | 33.5     |
| <b>missing data</b>   | 2                    | -                                     |          |
| <b>Total</b>          | 18130                | 5650                                  | 31.2     |
